# Supplementary material for: Seven new cytotoxic phenylspirodrimane derivatives from the endophytic fungus Stachybotrys chartarum
Source: PubMed Central journal article supplement — RSC Adv. 2019 Jan 25;9(7):3520–31. doi: 10.1039/c8ra10195g (PMC9060241; doi:10.1039/c8ra10195g), 2019-01-25
Supplement: RA-009-C8RA10195G-s001.pdf [file RA-009-C8RA10195G-s001.pdf]

## Supporting Information

### **Seven New Cytotoxic Phenylspirodrimane Derivatives from the Endophytic Fungus, *Stachybotrys chartarum***

Hong Zhang,<sup>#, a, b</sup> Ming-Hua Yang,<sup>#, b</sup> Fang-fang Zhuo,<sup>b</sup> Na Gao,<sup>b</sup> Xiao-Bei Cheng,  
<sup>b</sup> Xiao-Bing Wang,<sup>b</sup> Yue-Hu Pei,<sup>\*, a</sup> Ling-Yi Kong<sup>\*, b, a</sup>

<sup>a</sup> School of Traditional Chinese Materia Medica, Shenyang Pharmaceutical University;  
Key Laboratory of Structure-Based Drug Design and Discovery (Shenyang  
Pharmaceutical University), Ministry of Education, Wenhua Road 103, Shenyang  
110016, China

<sup>b</sup> Jiangsu Key Laboratory of Bioactive Natural Product Research and State Key  
Laboratory of Natural Medicines, China Pharmaceutical University, 24 Tong Jia  
Xiang, Nanjing 210009, People's Republic of China.

#### **Corresponding author contact details:**

Ling-Yi Kong:

Tel/Fax: +86 25 8327 1405;

E-mail: [cpu\\_lykong@126.com](mailto:cpu_lykong@126.com), [lykong@cpu.edu.cn](mailto:lykong@cpu.edu.cn).

Yue-Hu Pei:

Tel: +86-24-23986483.

Fax: +86-24-23986485

E-mail: [peiyueh@vip.163.com](mailto:peiyueh@vip.163.com).

## Contents

### 1. Tables

**Table S1.** Cytotoxicities of stachybochartins A-D and G in three human cancer cell lines with MTT method.....S1

### 2. Figures

**Figure S1.** The key HMBC and ROESY correlations of **2**.....S1

**Figure S2.** The comparison of the experimental ECD spectra of **1** and **2** in MeOH.....S1

**Figure S3.** The key HMBC and key ROESY correlations of stachybochartin D (**4**).....S2

**Figure S4.** The ECD spectra of stachybochartin C (**3**) and stachybochartin D (**4**) in MeOH.....S2

**Figure S5.** The experimental ECD spectra of **5**.....S2

**Figure S6.** The key HMBC and key ROESY correlations of stachybochartin F (**6**).....S3

**Figure S7.** The experimental ECD spectra of stachybochartin F (**6**).....S3

**Figure S8.** The key HMBC and ROESY correlations of stachybochartin G (**7**).....S3

**Figure S9.** The experimental ECD spectra of stachybochartin G (**7**).....S4

#### For compound 1

**Figure S10.** <sup>1</sup>H-NMR spectrum (500 MHz) of stachybochartin A (**1**) in CD<sub>3</sub>OD.....S4

**Figure S11.** <sup>13</sup>C-NMR spectrum (125 MHz) of stachybochartin A (**1**) in CD<sub>3</sub>OD.....S5

**Figure S12.** DEPT spectrum of stachybochartin A (**1**) in CD<sub>3</sub>OD.....S5

**Figure S13.** HSQC spectrum of stachybochartin A (**1**) in CD<sub>3</sub>OD. ....S6

**Figure S14.** HMBC spectrum of stachybochartin A (**1**) in CD<sub>3</sub>OD.....S6

**Figure S15.** <sup>1</sup>H-<sup>1</sup>H COSY spectrum of stachybochartin A (**1**) in CD<sub>3</sub>OD.....S7

**Figure S16.** ROESY spectrum of stachybochartin A (**1**) in CD<sub>3</sub>OD.....S7

**Figure S17.** HRESIMS spectrum of stachybochartin A (**1**) in MeOH.....S8

**Figure S18.** IR (KBr disc) spectrum of stachybochartin A (**1**). ....S8

**Figure S19.** UV spectrum of stachybochartin A (**1**) in MeOH.....S9

#### For compound 2

**Figure S20.** <sup>1</sup>H-NMR spectrum (500 MHz) of stachybochartin B (**2**) in CD<sub>3</sub>OD.....S9

**Figure S21.** <sup>13</sup>C-NMR spectrum (125 MHz) of stachybochartin B (**2**) in CD<sub>3</sub>OD.....S10

**Figure S22.** HSQC spectrum of stachybochartin B (**2**) in CD<sub>3</sub>OD.....S10

**Figure S23.** HMBC spectrum of stachybochartin B (**2**) in CD<sub>3</sub>OD.....S11

**Figure S24.** <sup>1</sup>H-<sup>1</sup>H COSY spectrum of stachybochartin B (**2**) in CD<sub>3</sub>OD.....S11

**Figure S25.** ROESY spectrum of stachybochartin B (**2**) in CD<sub>3</sub>OD.....S12

**Figure S26.** HRESIMS spectrum of stachybochartin B (**2**) in MeOH.....S12

**Figure S27.** IR (KBr disc) spectrum of stachybochartin B (**2**) ....S13

**Figure S28.** UV spectrum of stachybochartin B (**2**) in MeOH.....S13

#### For compound 3

**Figure S29.** <sup>1</sup>H NMR spectrum (500 MHz) of stachybochartin C (**3**) in CD<sub>3</sub>OD.....S14

**Figure S30.** <sup>13</sup>C-NMR spectrum (125 MHz) of stachybochartin C (**3**) in CD<sub>3</sub>OD.....S14

|                                                                                                                              |     |
|------------------------------------------------------------------------------------------------------------------------------|-----|
| <b>Figure S31.</b> HSQC spectrum of stachybochartin C ( <b>3</b> ) in CD <sub>3</sub> OD.....                                | S15 |
| <b>Figure S32.</b> HMBC spectrum of stachybochartin C ( <b>3</b> ) in CD <sub>3</sub> OD.....                                | S15 |
| <b>Figure S33.</b> <sup>1</sup> H- <sup>1</sup> H COSY spectrum of stachybochartin C ( <b>3</b> ) in CD <sub>3</sub> OD..... | S16 |
| <b>Figure S34.</b> ROESY spectrum of stachybochartin C ( <b>3</b> ) in CD <sub>3</sub> OD.....                               | S16 |
| <b>Figure S35.</b> HRESIMS spectrum of stachybochartin C ( <b>3</b> ) in MeOH.....                                           | S17 |
| <b>Figure S36.</b> IR (KBr disc) spectrum of stachybochartin C ( <b>3</b> ) .....                                            | S17 |
| <b>Figure S37.</b> UV spectrum of stachybochartin C ( <b>3</b> ) in MeOH.....                                                | S18 |

#### **For compound 4**

|                                                                                                                              |     |
|------------------------------------------------------------------------------------------------------------------------------|-----|
| <b>Figure S38.</b> <sup>1</sup> H-NMR spectrum (500 MHz) of stachybochartin D ( <b>4</b> ) in CD <sub>3</sub> OD.....        | S18 |
| <b>Figure S39.</b> <sup>13</sup> C-NMR spectrum (125 MHz) of stachybochartin D ( <b>4</b> ) in CD <sub>3</sub> OD.....       | S19 |
| <b>Figure S40.</b> DEPT spectrum of stachybochartin C ( <b>3</b> ) in CD <sub>3</sub> OD.....                                | S19 |
| <b>Figure S41.</b> HSQC spectrum of stachybochartin D ( <b>4</b> ) in CD <sub>3</sub> OD.....                                | S20 |
| <b>Figure S42.</b> HMBC spectrum of stachybochartin D ( <b>4</b> ) in CD <sub>3</sub> OD.....                                | S20 |
| <b>Figure S43.</b> <sup>1</sup> H- <sup>1</sup> H COSY spectrum of stachybochartin D ( <b>4</b> ) in CD <sub>3</sub> OD..... | S21 |
| <b>Figure S44.</b> ROESY spectrum of stachybochartin D ( <b>4</b> ) in CD <sub>3</sub> OD.....                               | S21 |
| <b>Figure S45.</b> HRESIMS spectrum of stachybochartin D ( <b>4</b> ) in MeOH.....                                           | S22 |
| <b>Figure S46.</b> IR (KBr disc) spectrum of stachybochartin D ( <b>4</b> ) .....                                            | S22 |
| <b>Figure S47.</b> UV spectrum of stachybochartin D ( <b>4</b> ) in MeOH.....                                                | S23 |

#### **For compound 5**

|                                                                                                                              |     |
|------------------------------------------------------------------------------------------------------------------------------|-----|
| <b>Figure S48.</b> <sup>1</sup> H-NMR spectrum (500 MHz) of stachybochartin E ( <b>5</b> ) in CD <sub>3</sub> OD.....        | S23 |
| <b>Figure S49.</b> <sup>13</sup> C-NMR spectrum (125 MHz) of stachybochartin E ( <b>5</b> ) in CD <sub>3</sub> OD.....       | S24 |
| <b>Figure S50.</b> HSQC spectrum of stachybochartin E ( <b>5</b> ) in CD <sub>3</sub> OD.....                                | S24 |
| <b>Figure S51.</b> HMBC spectrum of stachybochartin E ( <b>5</b> ) in CD <sub>3</sub> OD. ....                               | S25 |
| <b>Figure S52.</b> <sup>1</sup> H- <sup>1</sup> H COSY spectrum of stachybochartin E ( <b>5</b> ) in CD <sub>3</sub> OD..... | S25 |
| <b>Figure S53.</b> ROESY spectrum of stachybochartin E ( <b>5</b> ) in CD <sub>3</sub> OD. ....                              | S26 |
| <b>Figure S54.</b> HRESIMS spectrum of stachybochartin E ( <b>5</b> ) in MeOH.....                                           | S26 |
| <b>Figure S55.</b> IR (KBr disc) spectrum of stachybochartin E ( <b>5</b> ) .....                                            | S27 |
| <b>Figure S56.</b> UV spectrum of stachybochartin E ( <b>5</b> ) in MeOH.....                                                | S27 |

#### **For compound 6**

|                                                                                                                              |     |
|------------------------------------------------------------------------------------------------------------------------------|-----|
| <b>Figure S57.</b> <sup>1</sup> H-NMR spectrum (500 MHz) of stachybochartin F ( <b>6</b> ) in CD <sub>3</sub> OD.....        | S28 |
| <b>Figure S58.</b> <sup>13</sup> C-NMR spectrum (125 MHz) of stachybochartin F ( <b>6</b> ) in CD <sub>3</sub> OD.....       | S28 |
| <b>Figure S59.</b> HSQC spectrum of stachybochartin F ( <b>6</b> ) in CD <sub>3</sub> OD.....                                | S29 |
| <b>Figure S60.</b> HMBC spectrum of stachybochartin F ( <b>6</b> ) in CD <sub>3</sub> OD. ....                               | S29 |
| <b>Figure S61.</b> <sup>1</sup> H- <sup>1</sup> H COSY spectrum of stachybochartin F ( <b>6</b> ) in CD <sub>3</sub> OD..... | S30 |
| <b>Figure S62.</b> ROESY spectrum of stachybochartin F ( <b>6</b> ) in CD <sub>3</sub> OD. ....                              | S30 |
| <b>Figure S63.</b> HRESIMS spectrum of stachybochartin F ( <b>6</b> ) in MeOH. ....                                          | S31 |
| <b>Figure S64.</b> IR (KBr disc) spectrum of stachybochartin F ( <b>6</b> ) .....                                            | S31 |
| <b>Figure S65.</b> UV spectrum of stachybochartin F ( <b>6</b> ) in MeOH.....                                                | S32 |

#### **For compound 7**

|                                                                                                                        |     |
|------------------------------------------------------------------------------------------------------------------------|-----|
| <b>Figure S66.</b> <sup>1</sup> H-NMR spectrum (500 MHz) of stachybochartin G ( <b>7</b> ) in CD <sub>3</sub> OD.....  | S32 |
| <b>Figure S67.</b> <sup>13</sup> C-NMR spectrum (125 MHz) of stachybochartin G ( <b>7</b> ) in CD <sub>3</sub> OD..... | S33 |

|                                                                                                                     |     |
|---------------------------------------------------------------------------------------------------------------------|-----|
| <b>Figure S68.</b> HSQC spectrum of stachybochartin G (7) in CD <sub>3</sub> OD.....                                | S33 |
| <b>Figure S69.</b> HMBC spectrum of stachybochartin G (7) in CD <sub>3</sub> OD.<br>.....                           | S34 |
| <b>Figure S70.</b> <sup>1</sup> H- <sup>1</sup> H COSY spectrum of stachybochartin G (7) in CD <sub>3</sub> OD..... | S34 |
| <b>Figure S71.</b> ROESY spectrum of stachybochartin G (7) in CD <sub>3</sub> OD. ....                              | S35 |
| <b>Figure S72.</b> HRESIMS spectrum of stachybochartin G (7) in MeOH.....                                           | S35 |
| <b>Figure S73.</b> IR (KBr disc) spectrum of stachybochartin G (7) .....                                            | S36 |
| <b>Figure S74.</b> UV spectrum of stachybochartin G (7) in MeOH.....                                                | S36 |

## Bioactivity assay

Cytotoxic activities were evaluated by the MTT method against three human tumor cell lines, including MDA-MB-231, U2-OS, and MCF-7. Cisplatin and doxorubicin were used as the positive control medicines. The IC<sub>50</sub> values were shown in Table S1.

**Table S1.** Cytotoxicities of stachybochartins A-D and G in three human tumor cell lines with MTT method.

| compound           | cytotoxicity (IC <sub>50</sub> , $\mu$ M) |                |       |
|--------------------|-------------------------------------------|----------------|-------|
|                    | MDA-MB-231                                | U2-OS          | MCF-7 |
| Stachybochartin A  | 21.7 $\pm$ 2.1                            | 19.8 $\pm$ 2.5 | > 50  |
| Stachybochartin B  | 17.6 $\pm$ 0.6                            | 11.2 $\pm$ 2.1 | > 50  |
| Stachybochartin C  | 11.6 $\pm$ 1.6                            | 14.5 $\pm$ 3.1 | > 50  |
| Stachybochartin D  | 10.4 $\pm$ 0.9                            | 9.2 $\pm$ 0.1  | > 50  |
| Stachybochartin G  | 5.6 $\pm$ 0.1                             | 4.5 $\pm$ 2.2  | > 50  |
| <b>Cisplatin</b>   | 11.3 $\pm$ 0.6                            | 5.9 $\pm$ 1.3  | -     |
| <b>Doxorubicin</b> | 1.0 $\pm$ 0.1                             | 1.2 $\pm$ 0.9  | -     |

Data were expressed as means  $\pm$  SD of three independent experiments.

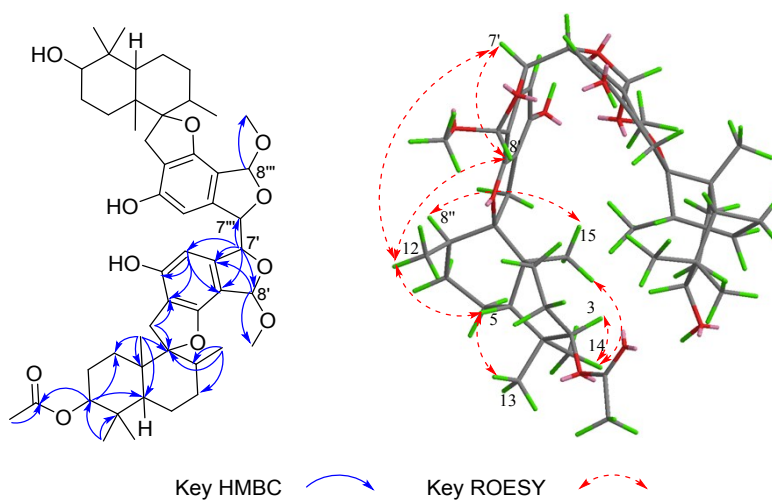

**Figure S1.** The key HMBC and ROESY correlations of **2**

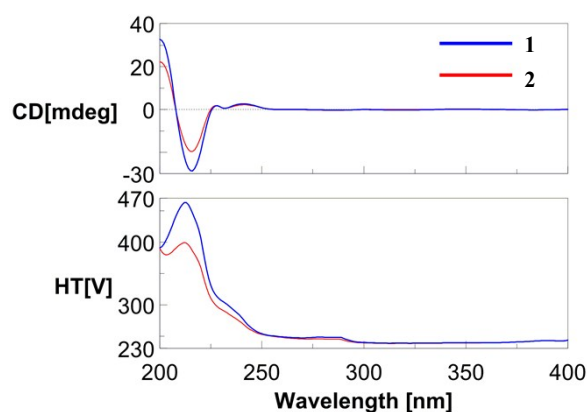

**Figure S2.** The comparison of the experimental ECD spectra of **1** and **2**

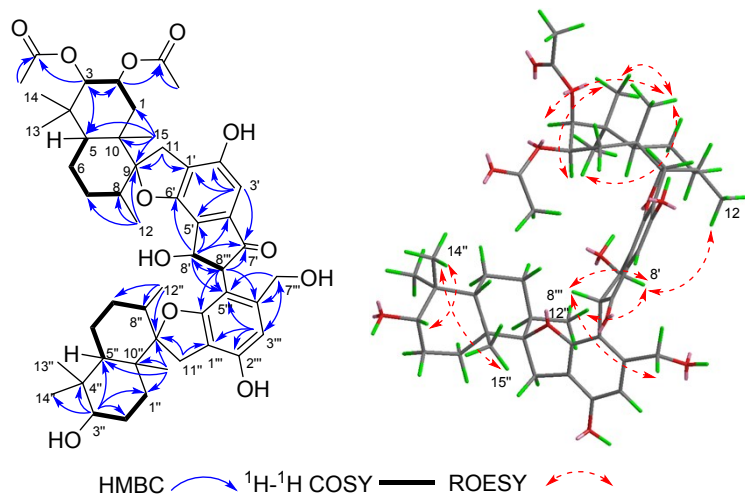

**Figure S3.** The key HMBC and key ROESY correlations of stachybochartin D (4).

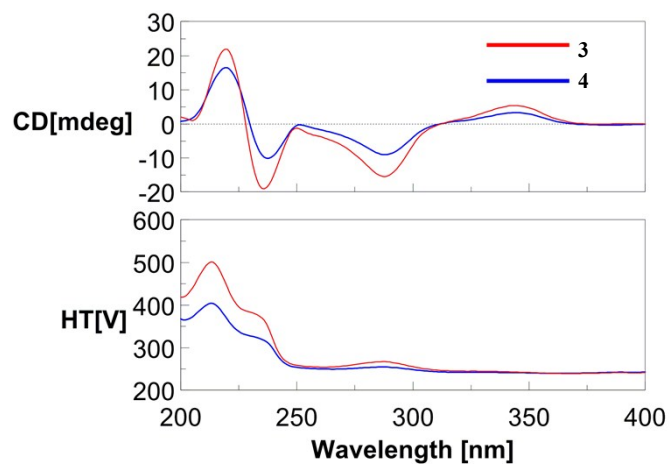

**Figure S4.** The ECD spectra of stachybochartin C (3) and stachybochartin D (4) in MeOH.

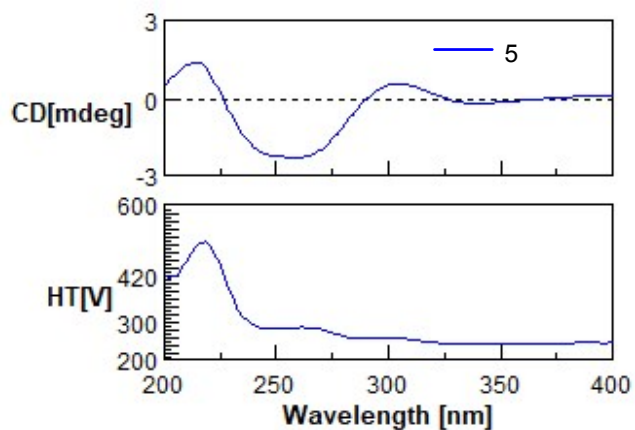

**Figure S5.** The experimental ECD spectra of 5.

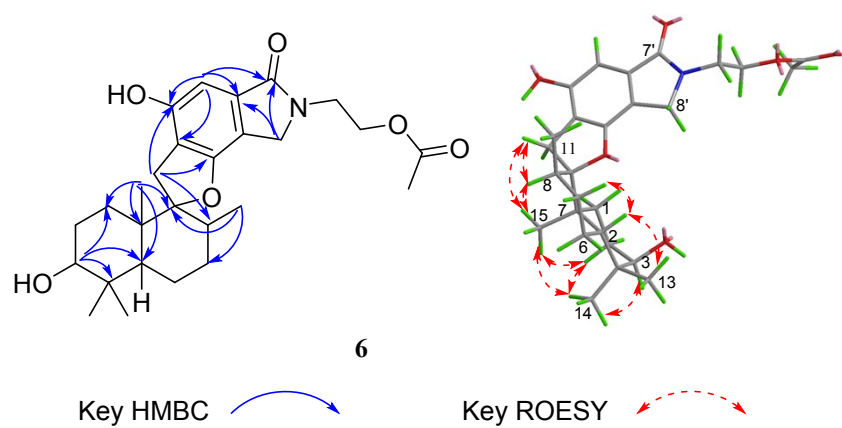

**Figure S6.** The key HMBC and ROESY correlations of stachybochartin F (6)

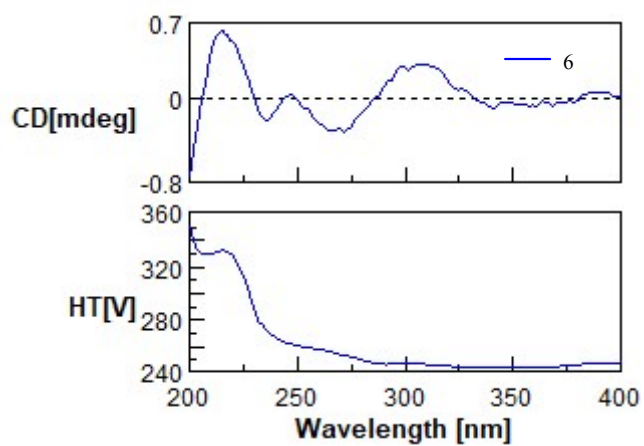

**Figure S7.** The experimental ECD spectra of stachybochartin F (6).

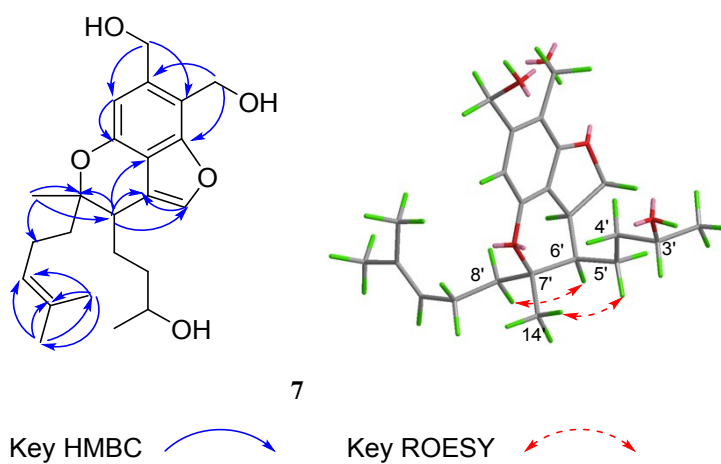

**Figure S8.** The key HMBC and ROESY correlations of stachybochartin G (7)

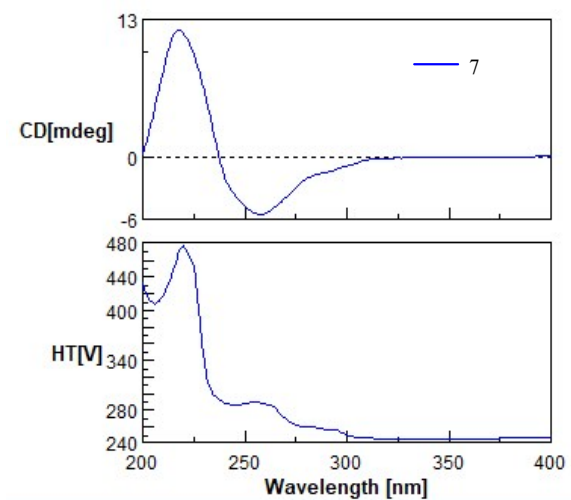

Figure S9. The experimental ECD spectra of stachybochartin G (7).

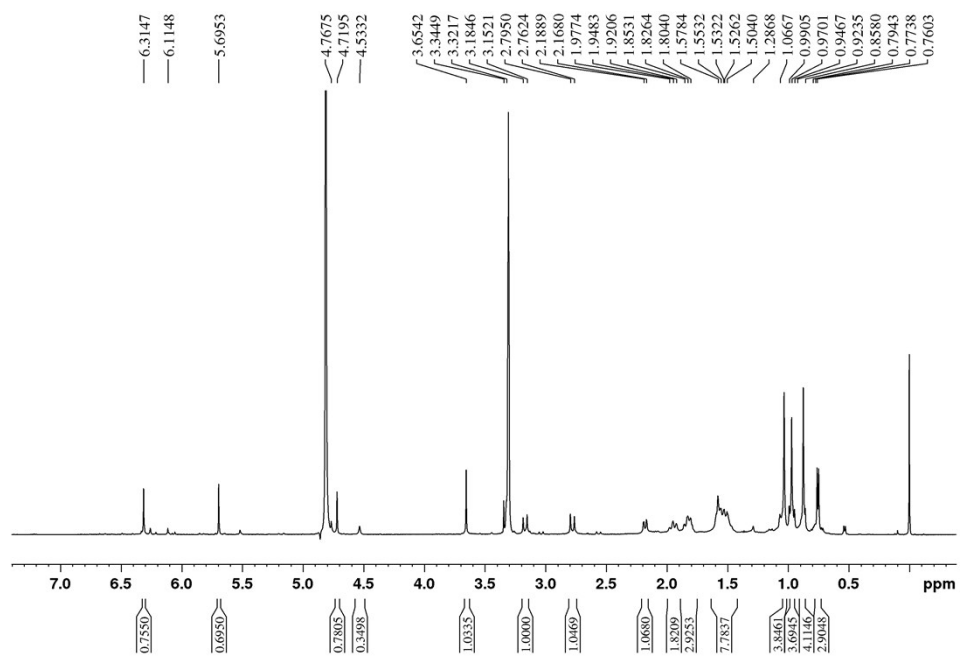

Figure S10.  $^1\text{H}$  NMR spectrum of stachybochartin A (1) in  $\text{CD}_3\text{OD}$ .



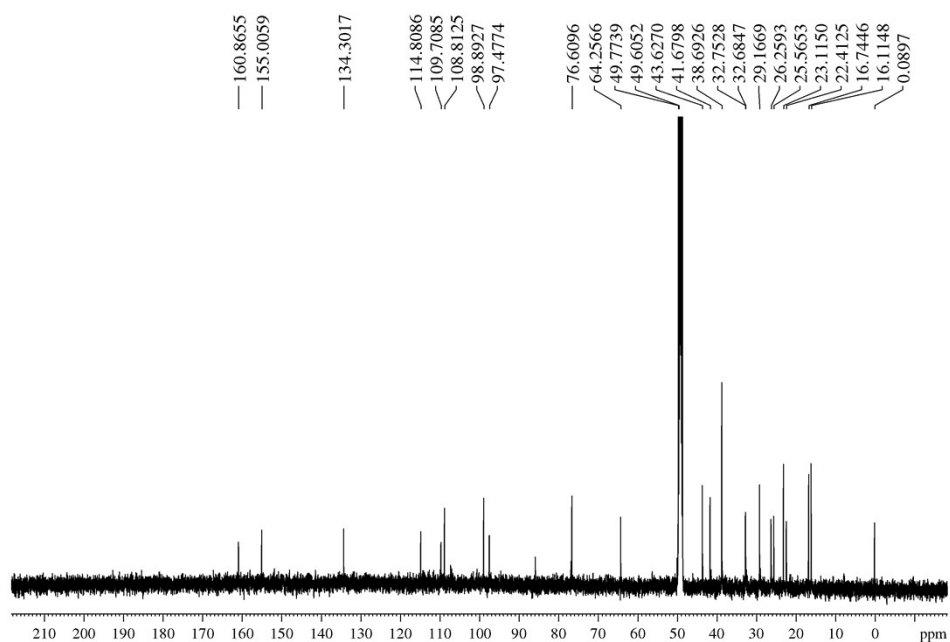

**Figure S11.**  $^{13}\text{C}$  NMR spectrum of stachybochartin A (**1**) in  $\text{CD}_3\text{OD}$ .

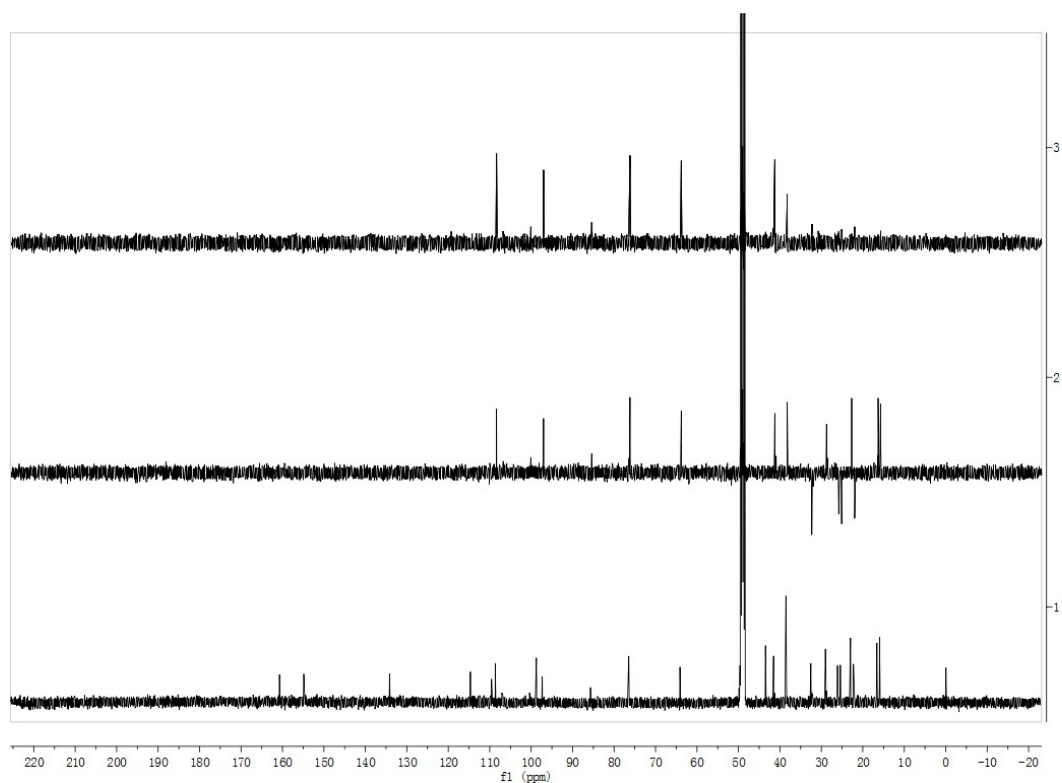

**Figure S12.** DEPT spectrum of stachybochartin A (**1**) in  $\text{CD}_3\text{OD}$ .

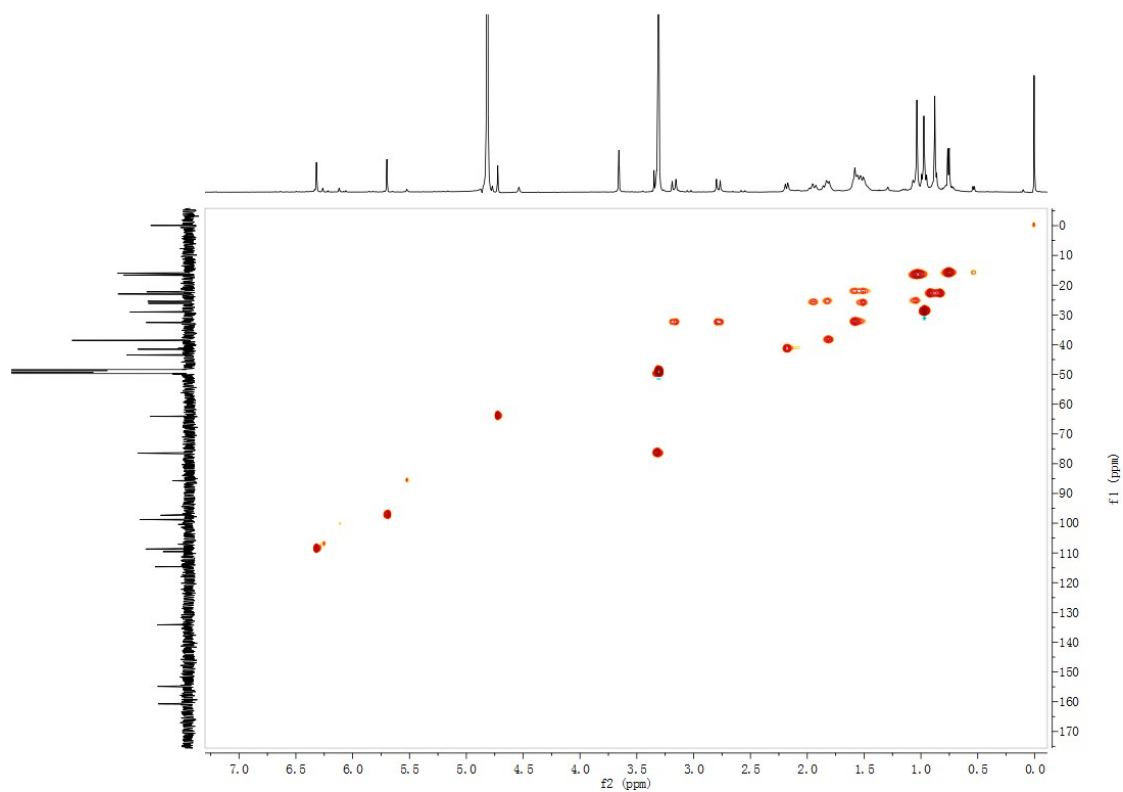

Figure S13. HSQC spectrum of stachybochartin A (**1**) in CD<sub>3</sub>OD.

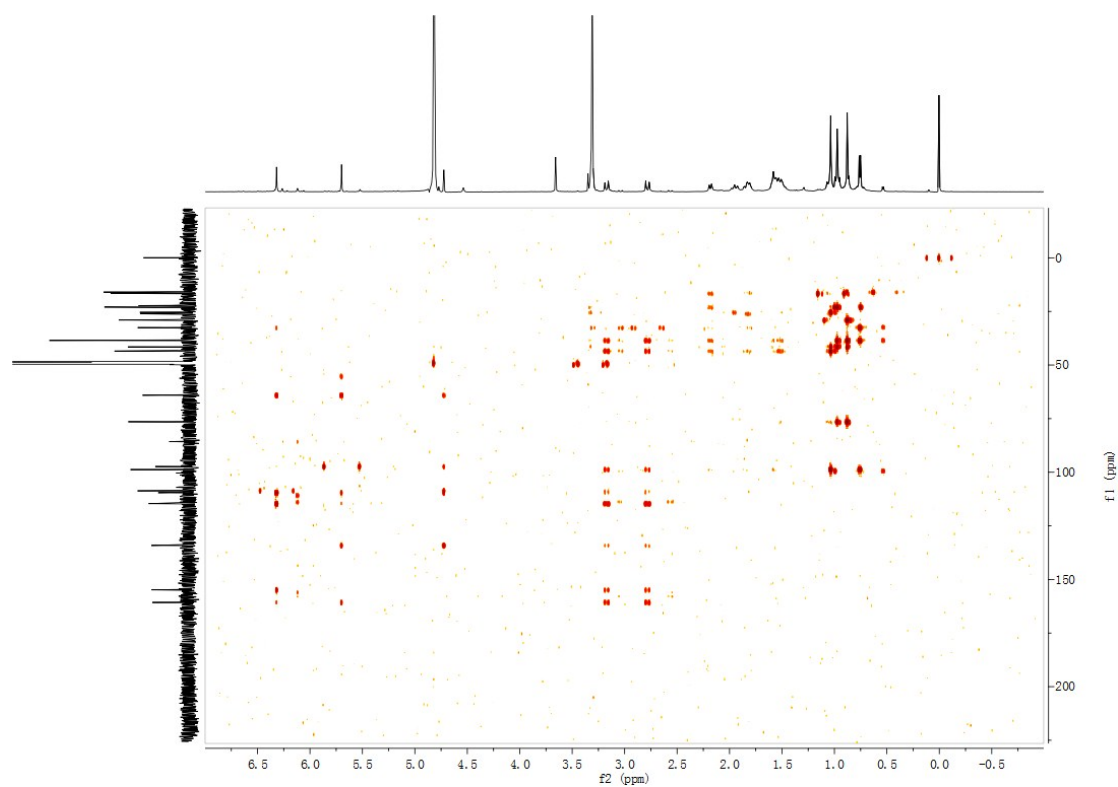

Figure S14. HMBC spectrum of stachybochartin A (**1**) in CD<sub>3</sub>OD.

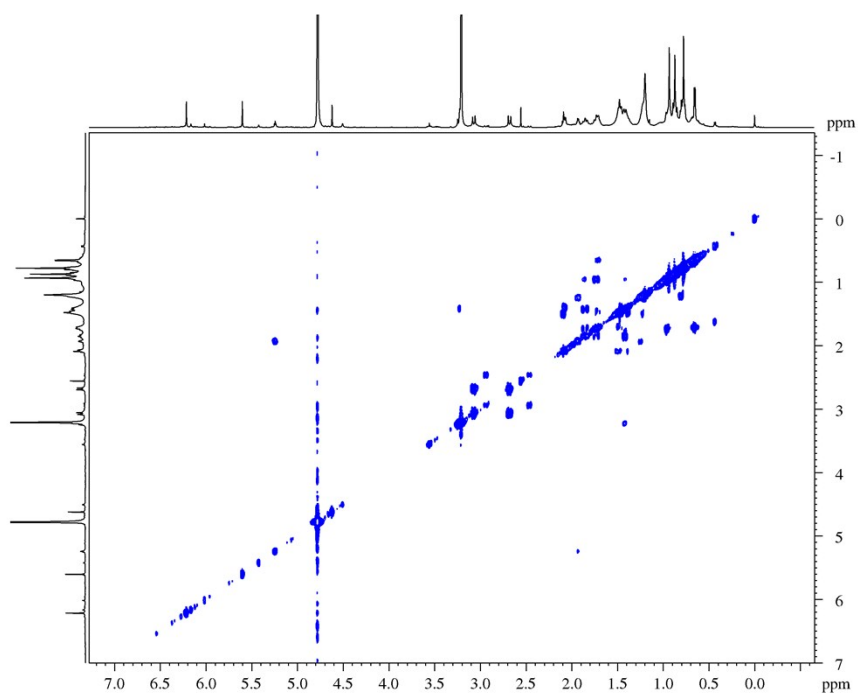

**Figure S15.**  $^1\text{H}$ - $^1\text{H}$  COSY spectrum of stachybochartin A (**1**) in  $\text{CD}_3\text{OD}$

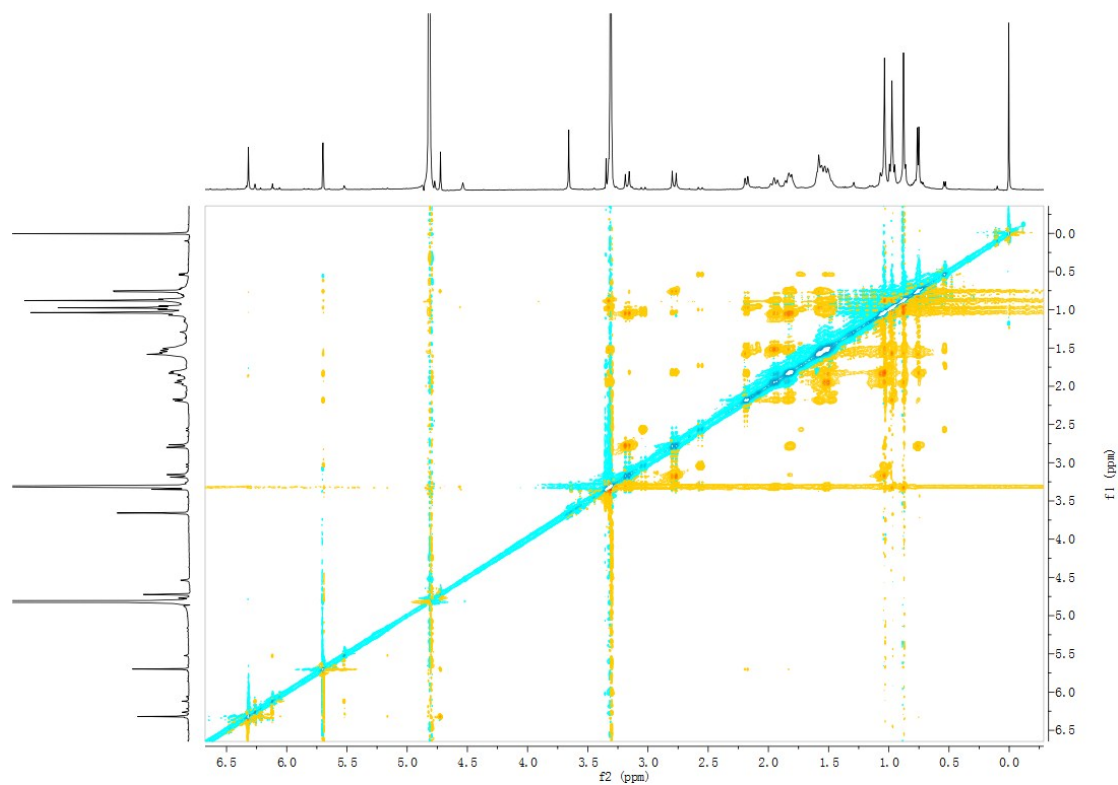

**Figure S16.** ROESY spectrum of stachybochartin A (**1**) in  $\text{CD}_3\text{OD}$ .

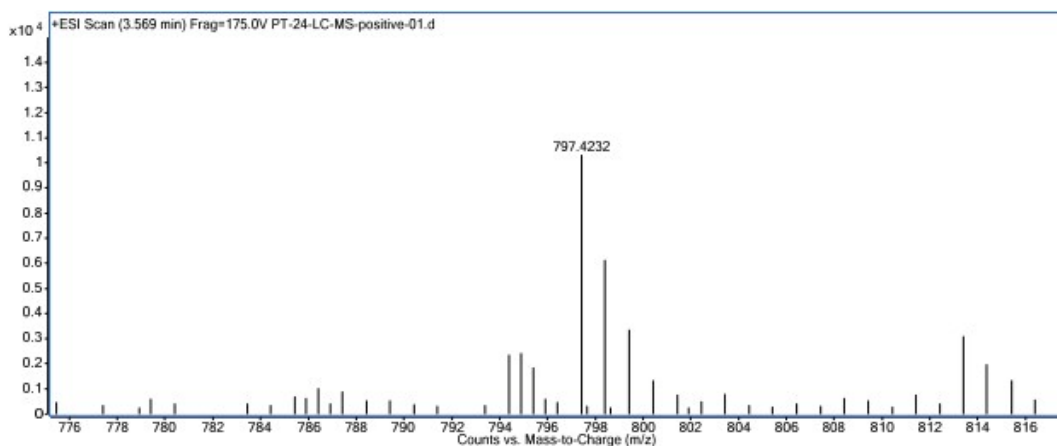

### Elemental Composition Calculator

|                                                   |                                         |                     |                  |                 |                     |
|---------------------------------------------------|-----------------------------------------|---------------------|------------------|-----------------|---------------------|
| <b>Target m/z:</b>                                | 797.4232                                | <b>Result type:</b> | Positive ions    | <b>Species:</b> | [M+Na] <sup>+</sup> |
| <b>Elements:</b>                                  | C (0-80); H (0-120); O (0-30); Na (0-5) |                     |                  |                 |                     |
| <b>Ion Formula</b>                                | <b>Calculated m/z</b>                   |                     | <b>PPM Error</b> |                 |                     |
| C <sub>46</sub> H <sub>62</sub> NaO <sub>10</sub> | 797.4235                                |                     | 0.37             |                 |                     |

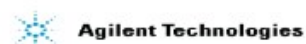

Figure S17. HRESIMS spectrum of stachybochartin A (1).

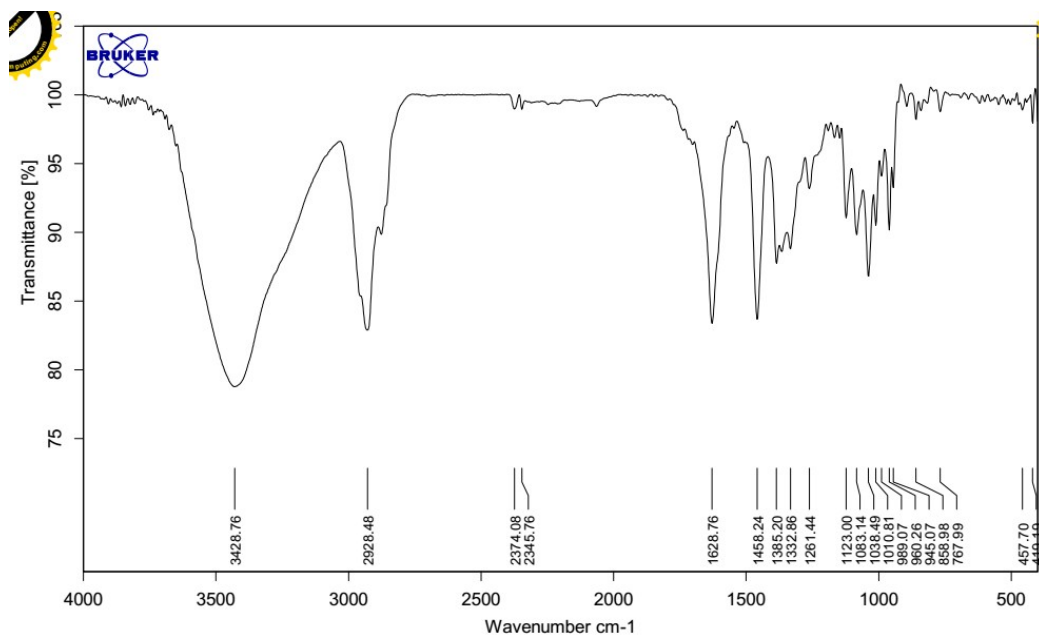

Figure S18. IR (KBr disc) spectrum of stachybochartin A (1)

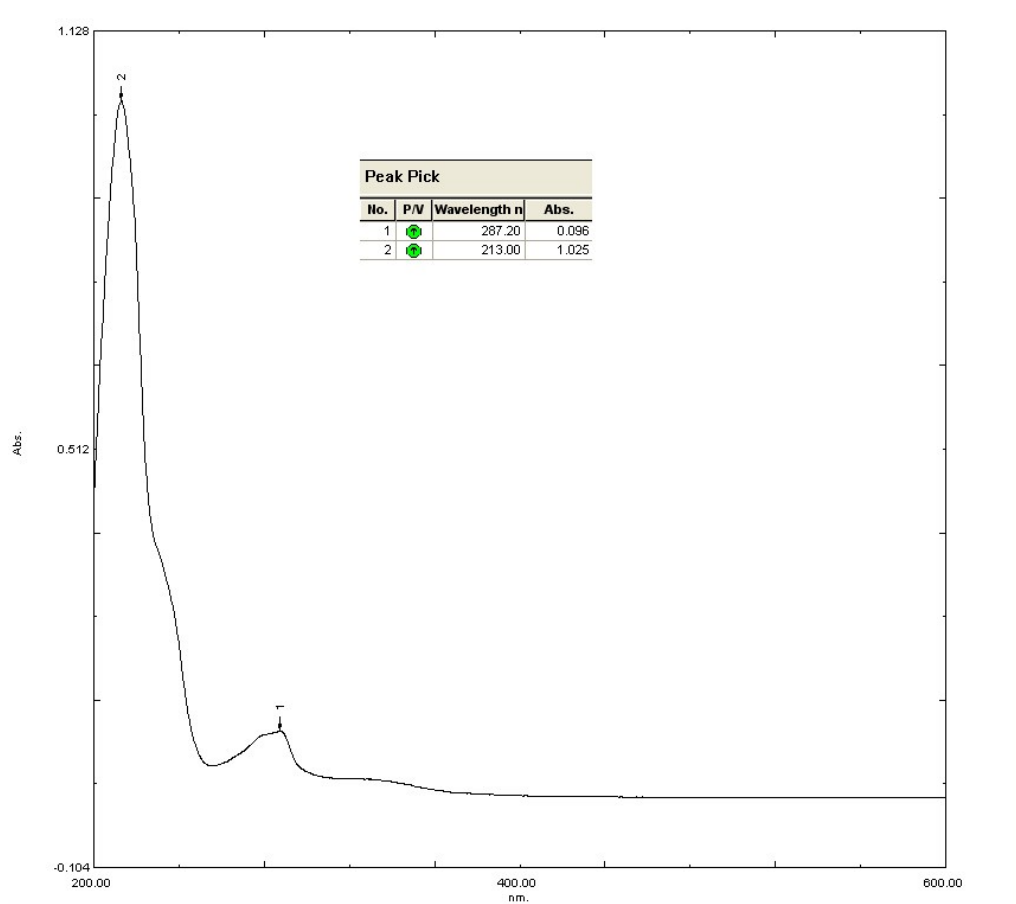

Figure S19. UV spectrum of stachybochartin A (1)

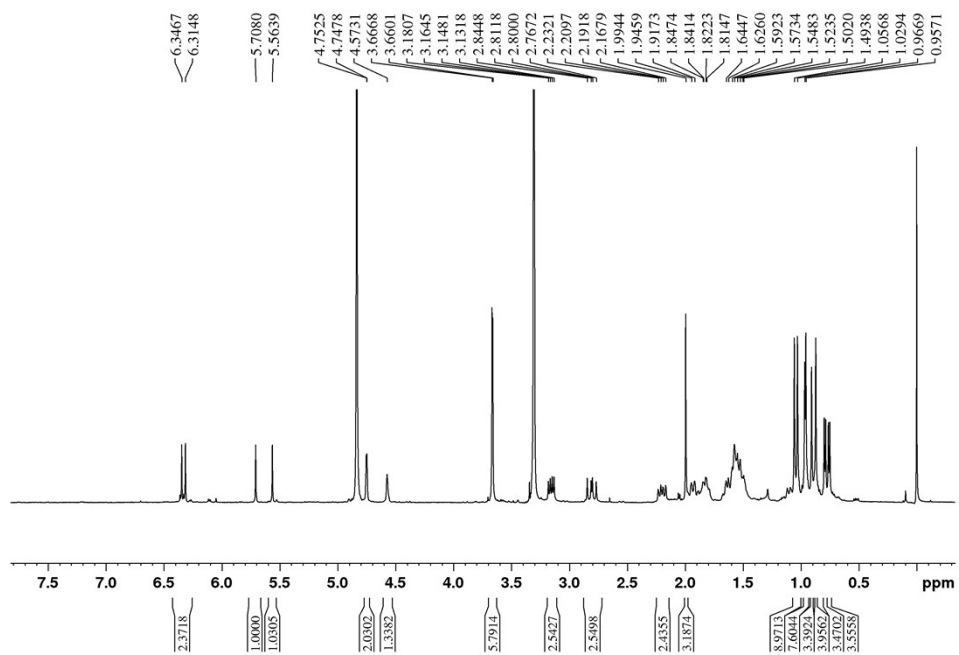

Figure S20.  $^1\text{H}$  NMR spectrum of stachybochartin B (2) in  $\text{CD}_3\text{OD}$ .

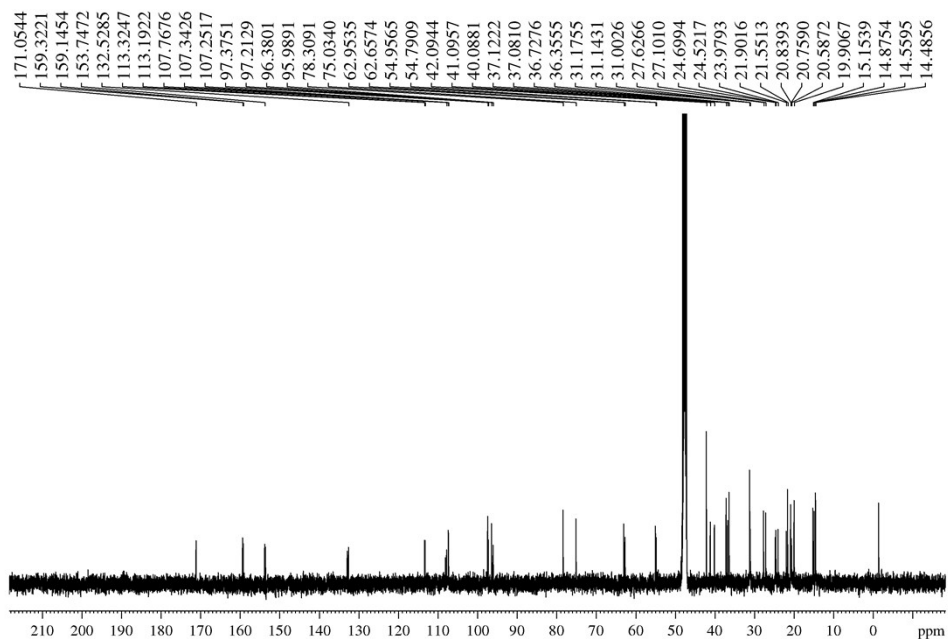

Figure S21.  $^{13}\text{C}$  NMR spectrum of stachybochartin B (**2**) in  $\text{CD}_3\text{OD}$ .

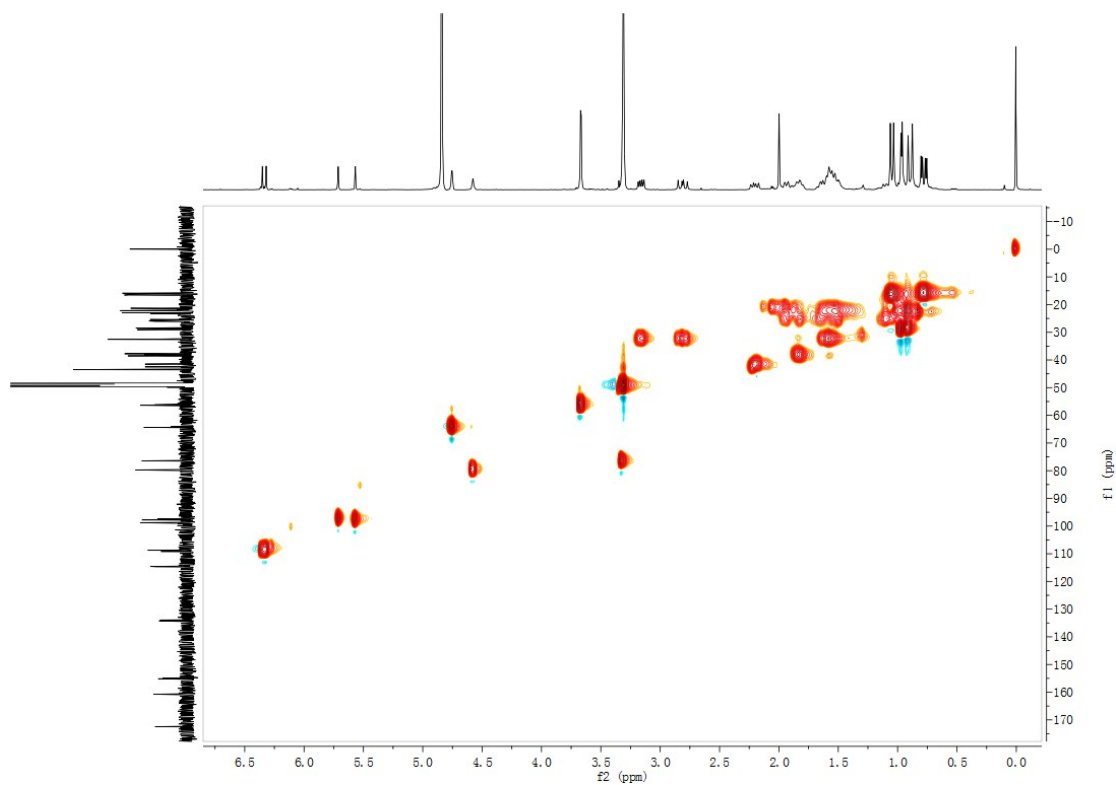

Figure S22. HSQC spectrum of stachybochartin B (**2**) in  $\text{CD}_3\text{OD}$ .

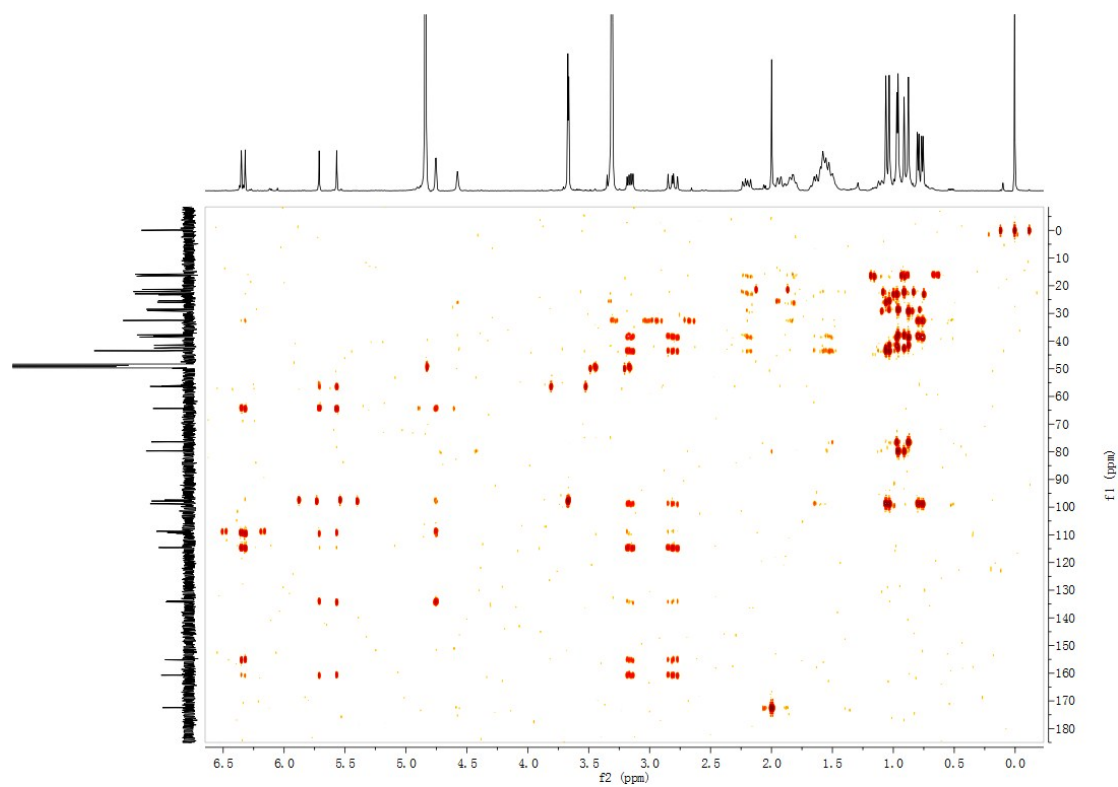

**Figure S23.** HMBC spectrum of stachybochartin B (**2**) in  $\text{CD}_3\text{OD}$ .

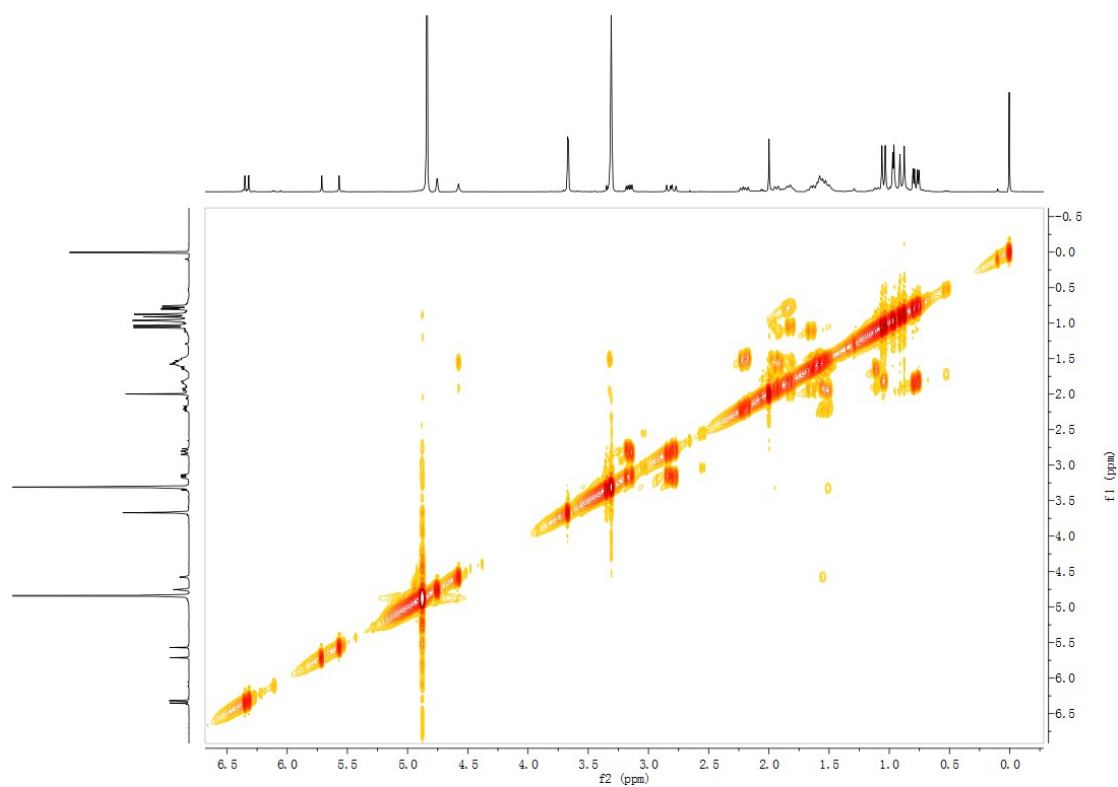

**Figure S24.**  $^1\text{H}$ - $^1\text{H}$  COSY spectrum of stachybochartin B (**2**) in  $\text{CD}_3\text{OD}$ .

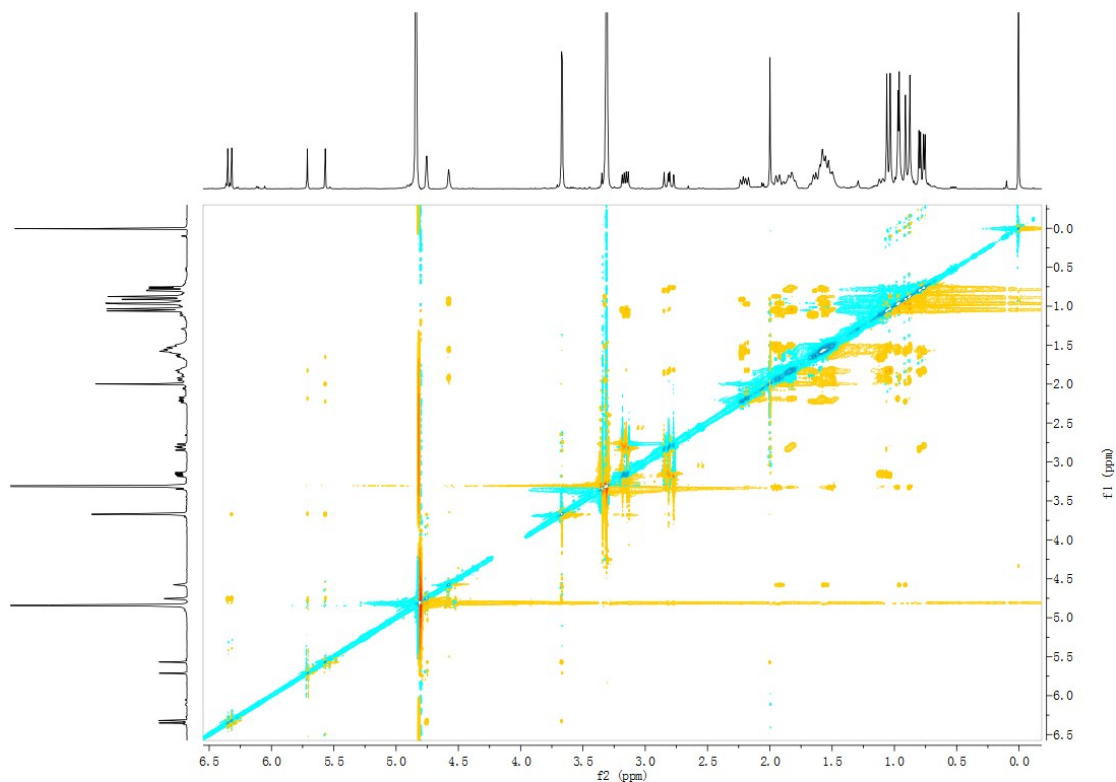

**Figure S25.** ROESY spectrum of stachybochartin B (**2**) in CD<sub>3</sub>OD.

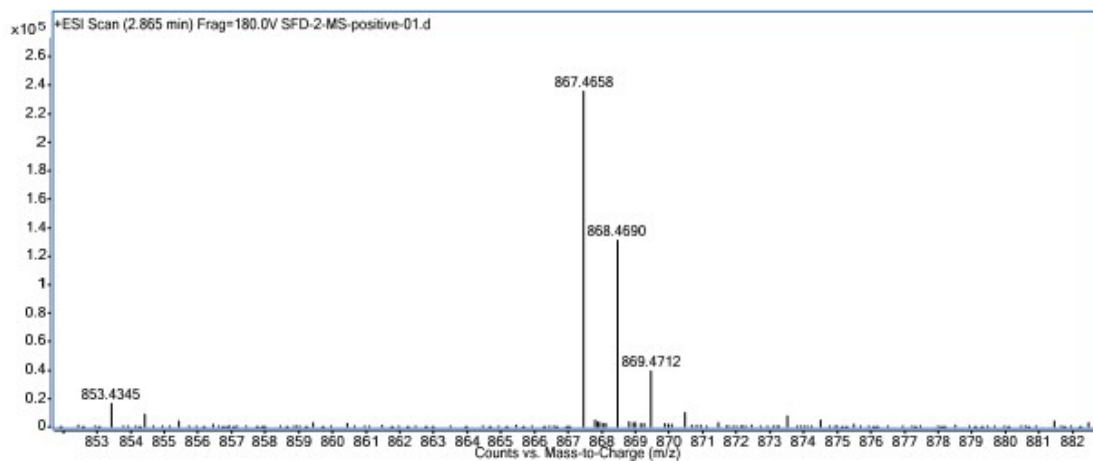

### Elemental Composition Calculator

|                    |                                         |                     |                  |                 |                     |
|--------------------|-----------------------------------------|---------------------|------------------|-----------------|---------------------|
| <b>Target m/z:</b> | 867.4658                                | <b>Result type:</b> | Positive ions    | <b>Species:</b> | [M+Na] <sup>+</sup> |
| <b>Elements:</b>   | C (0-80); H (0-120); O (0-30); Na (0-5) |                     |                  |                 |                     |
| <b>Ion Formula</b> | <b>Calculated m/z</b>                   |                     | <b>PPM Error</b> |                 |                     |
| C50H68NaO11        | 867.4654                                |                     | -0.4             |                 |                     |

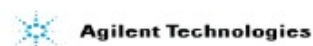

**Figure S26.** HRESIMS spectrum of stachybochartin B (**2**).



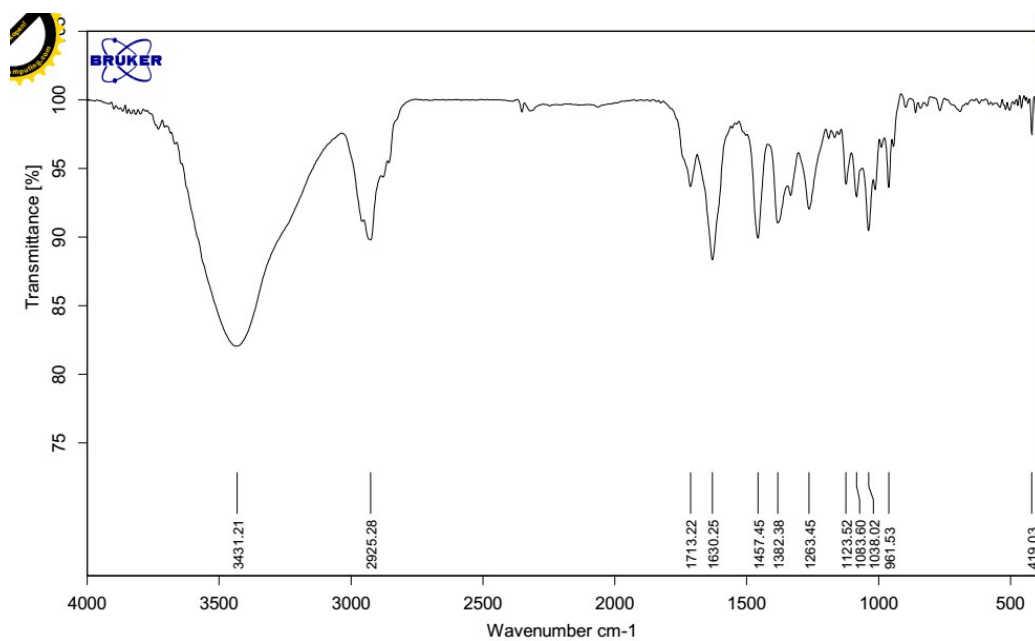

**Figure S27.** IR (KBr disc) spectrum of stachybochartin B (2).

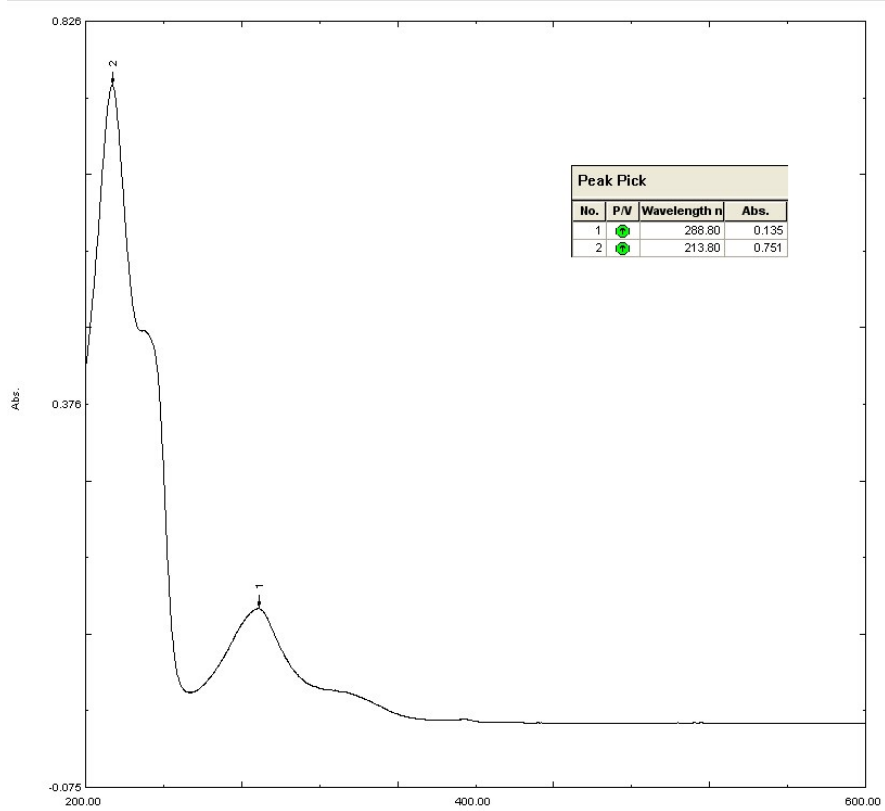

**Figure S28.** UV spectrum of stachybochartin B (2).

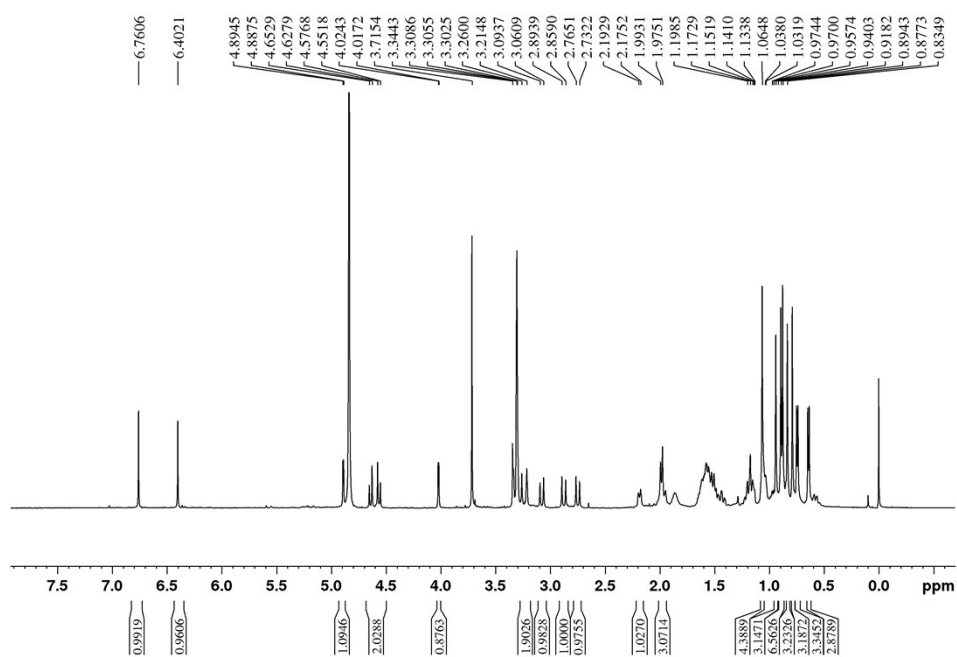

Figure S29.  $^1\text{H}$  NMR spectrum of stachybochartin C (**3**) in  $\text{CD}_3\text{OD}$ .

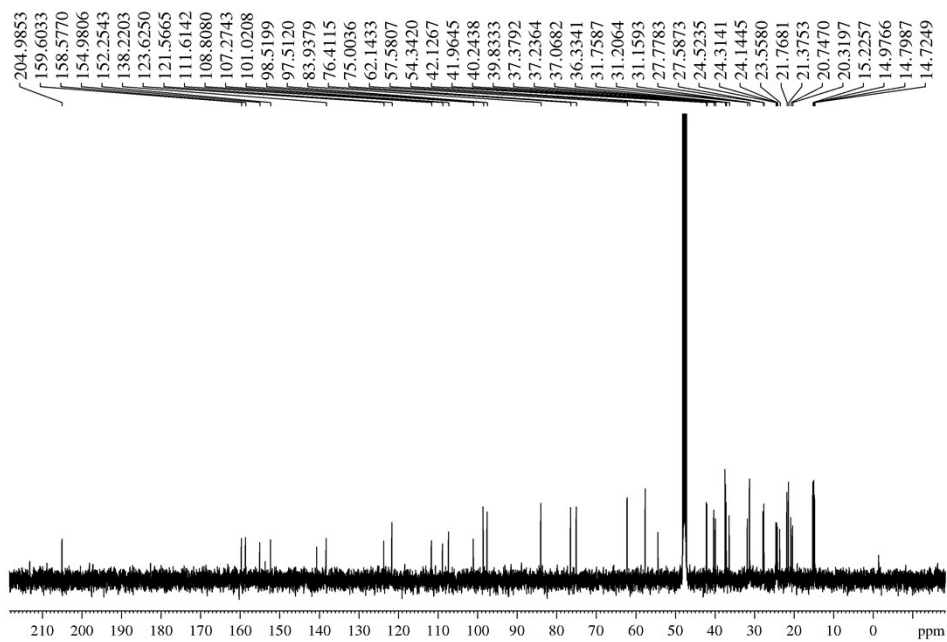

Figure S30.  $^{13}\text{C}$  NMR spectrum of stachybochartin C (**3**) in  $\text{CD}_3\text{OD}$ .

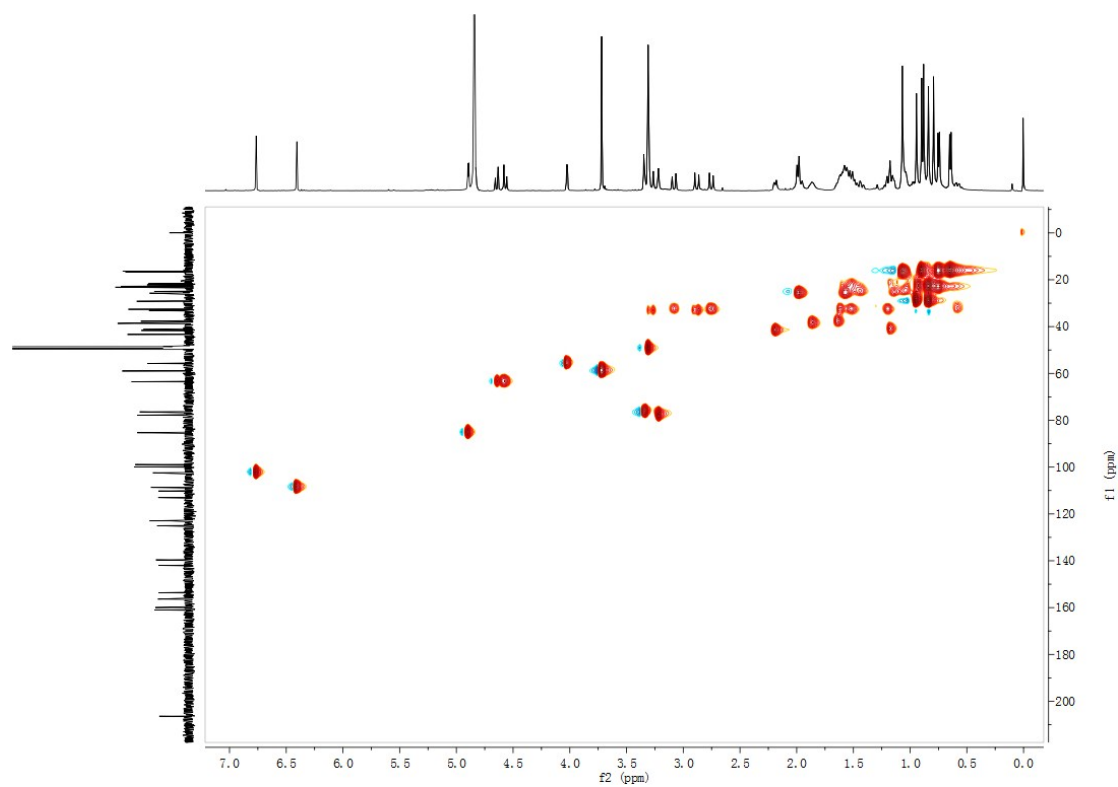

Figure S31. HSQC spectrum of stachybochartin C (**3**) in CD<sub>3</sub>OD.

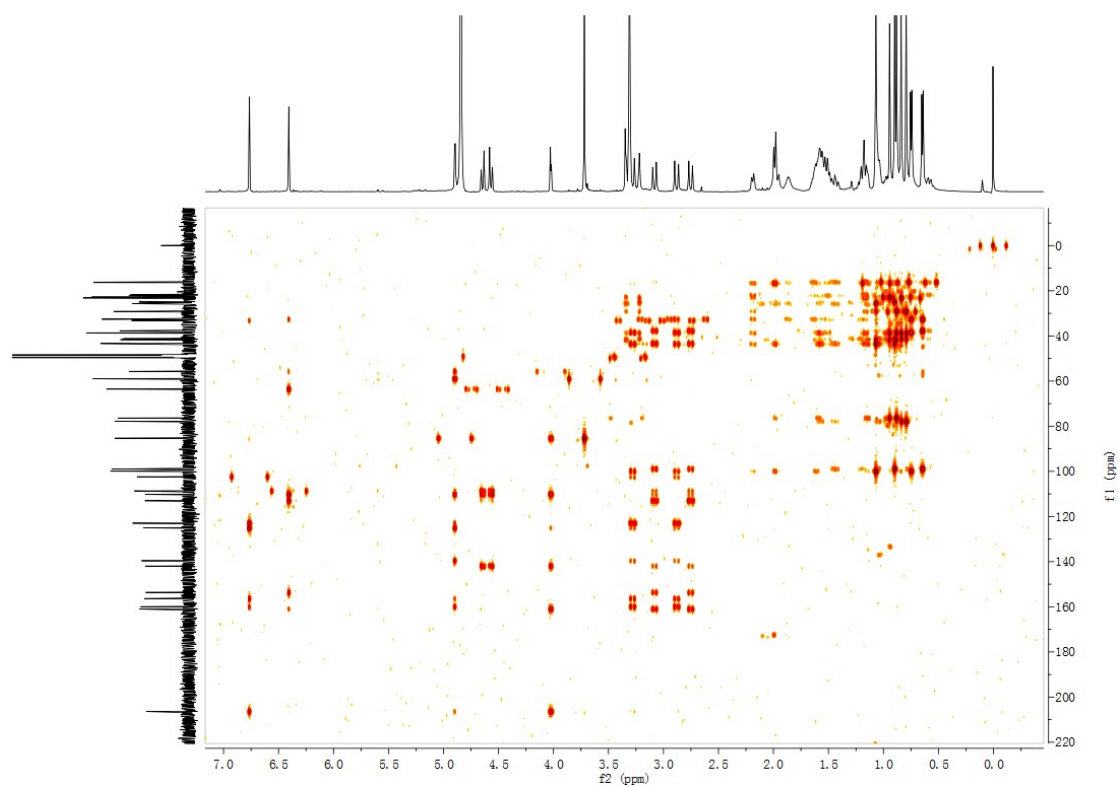

Figure S32. HMBC spectrum of stachybochartin C (**3**) in CD<sub>3</sub>OD.

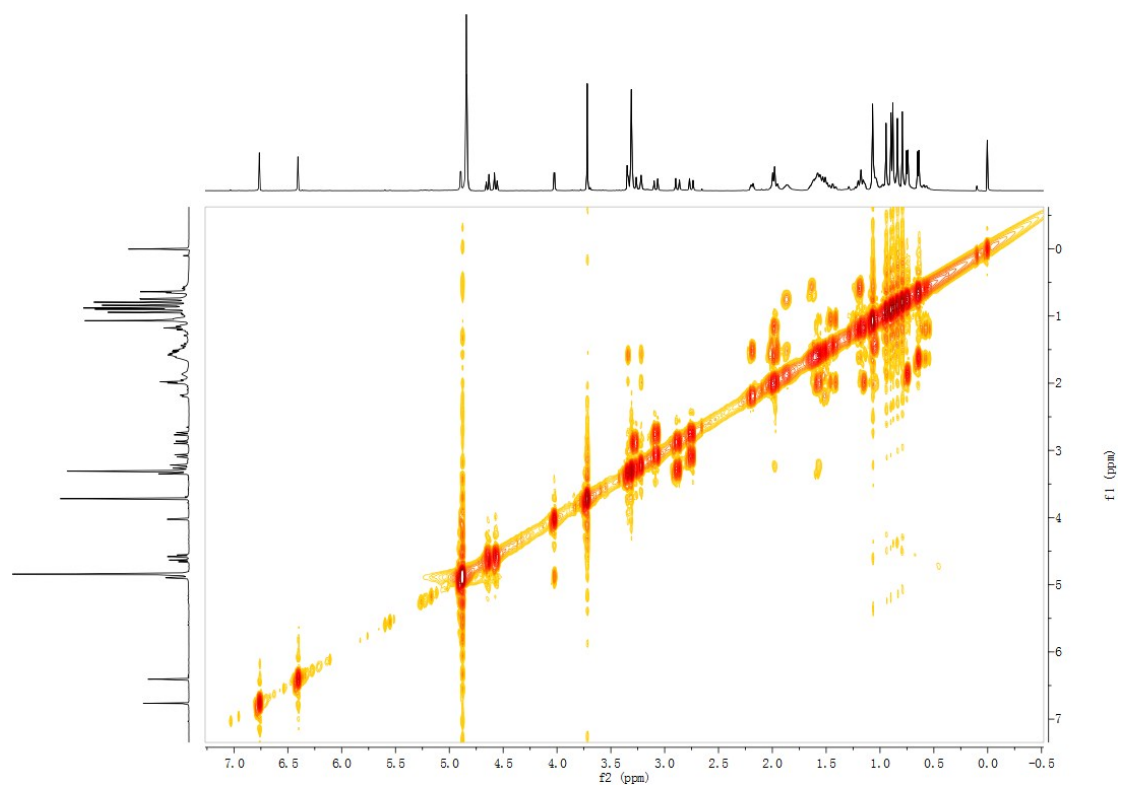

**Figure S33.**  $^1\text{H}$ - $^1\text{H}$  COSY spectrum of stachybochartin C (**3**) in  $\text{CD}_3\text{OD}$ .

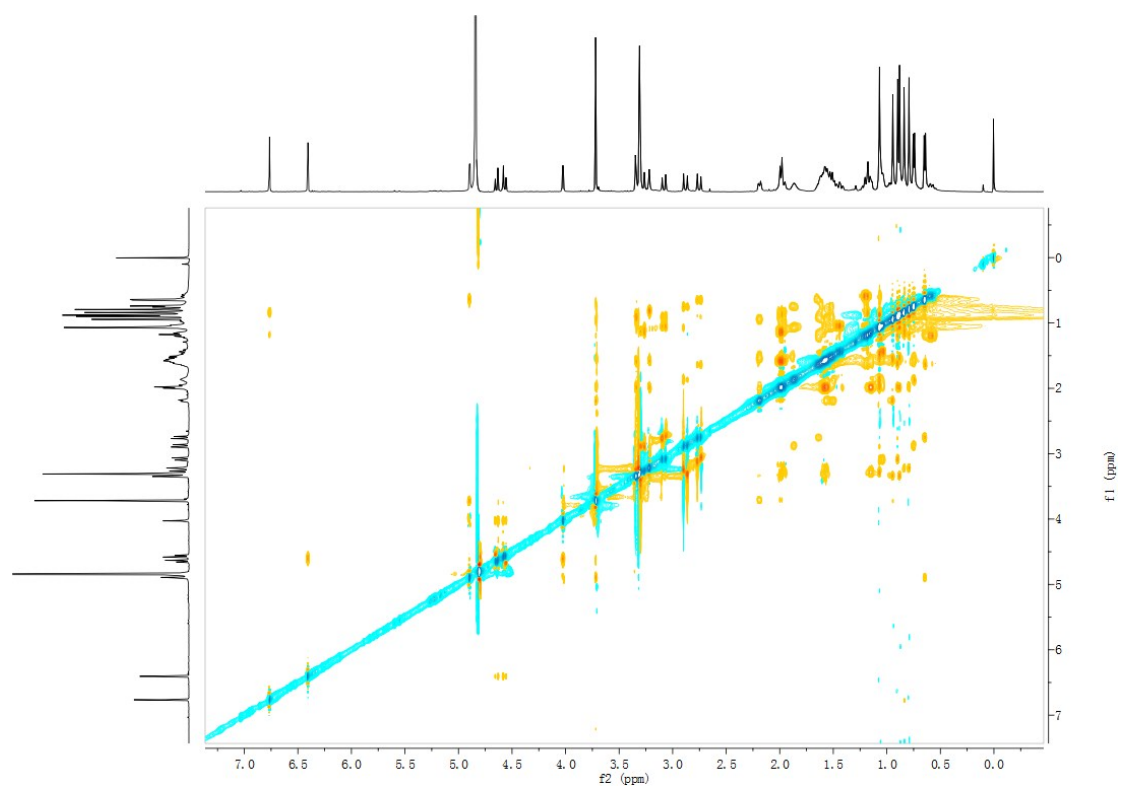

**Figure S34.** ROESY spectrum of stachybochartin C (**3**) in  $\text{CD}_3\text{OD}$ .

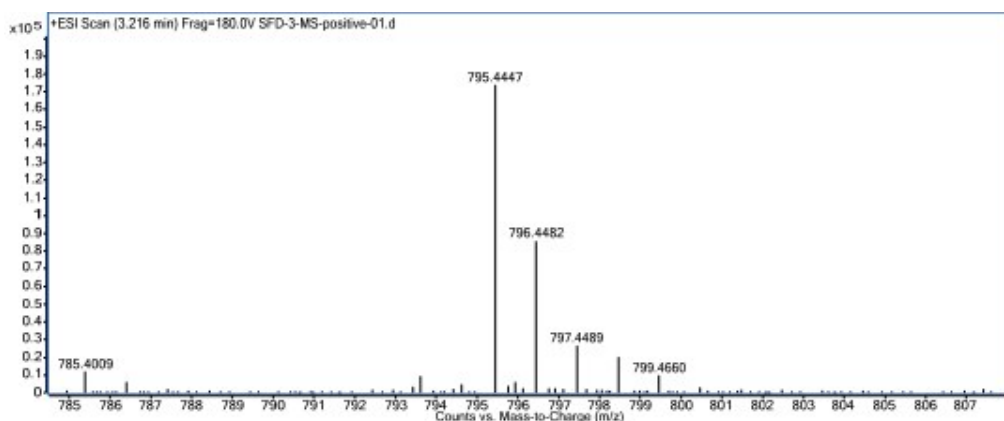

### Elemental Composition Calculator

|                                                  |                                         |                     |               |                 |                     |
|--------------------------------------------------|-----------------------------------------|---------------------|---------------|-----------------|---------------------|
| <b>Target m/z:</b>                               | 795.4447                                | <b>Result type:</b> | Positive ions | <b>Species:</b> | [M+Na] <sup>+</sup> |
| <b>Elements:</b>                                 | C (0-80); H (0-120); O (0-30); Na (0-5) |                     |               |                 |                     |
| <b>Ion Formula</b>                               | <b>Calculated m/z</b>                   | <b>PPM Error</b>    |               |                 |                     |
| C <sub>47</sub> H <sub>64</sub> NaO <sub>9</sub> | 795.4443                                | -0.4                |               |                 |                     |

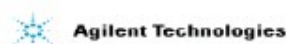

Figure S35. HRESIMS spectrum of stachybochartin C (3).

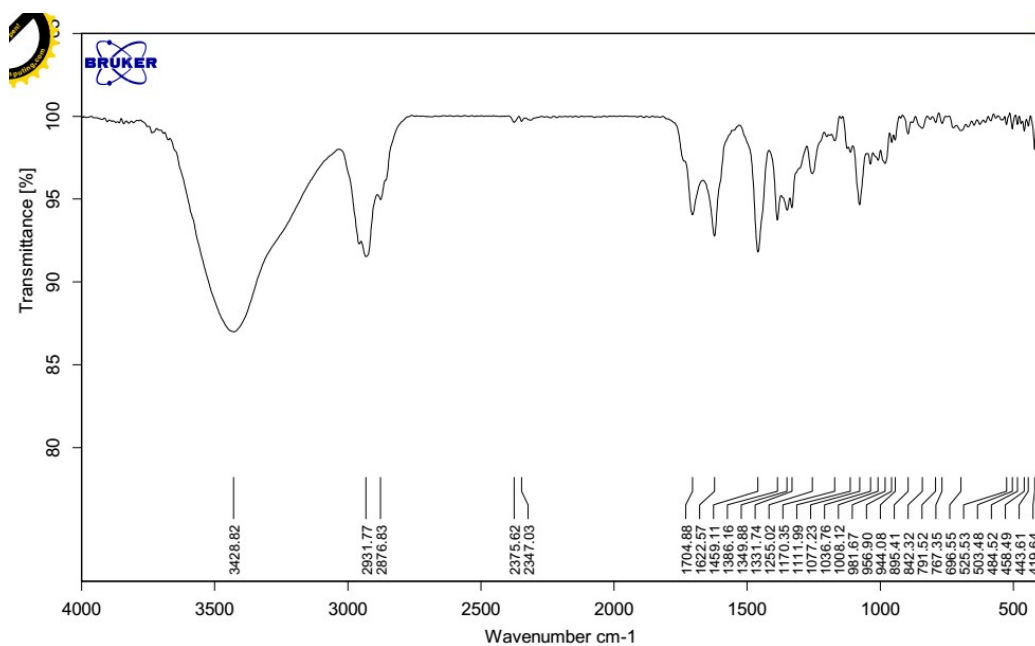

Figure S36. IR (KBr disc) spectrum of stachybochartin C (3).

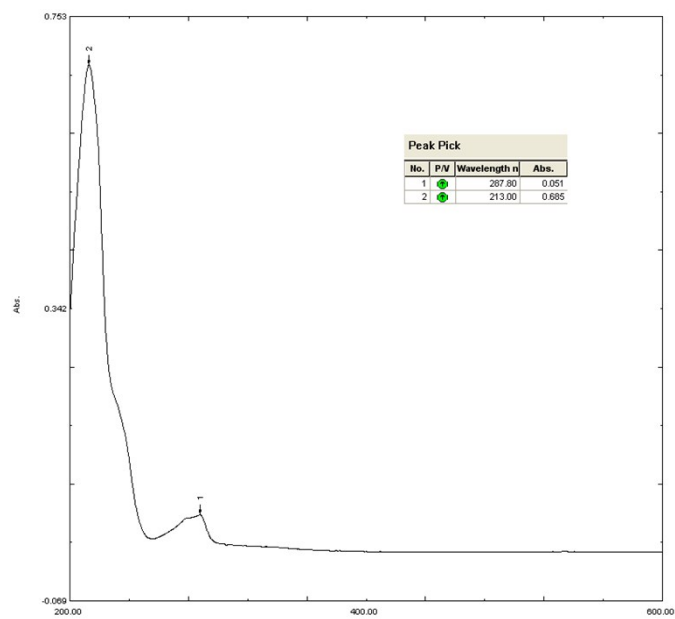

Figure S37. UV spectrum of stachybochartin C (3).

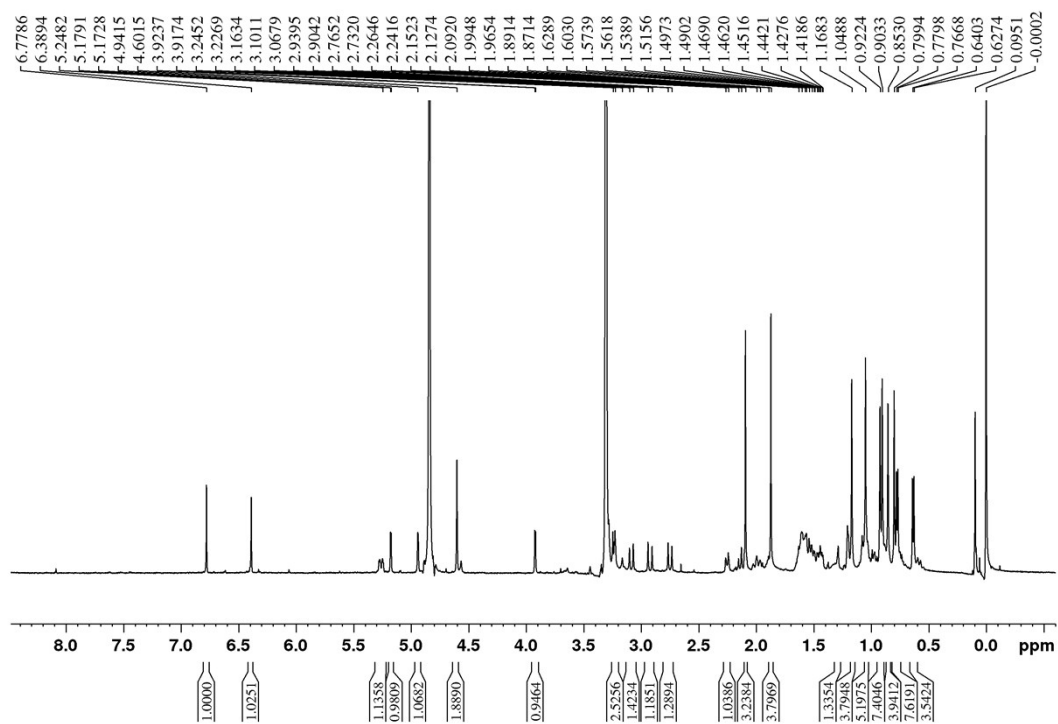

Figure S38. <sup>1</sup>H NMR spectrum of stachybochartin D (4) in CD<sub>3</sub>OD.

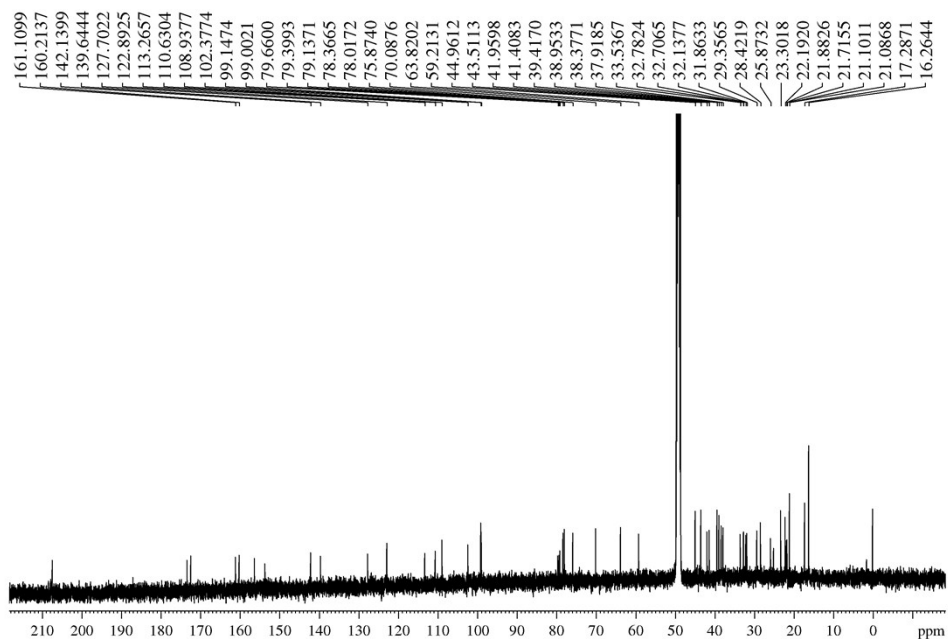

Figure S39.  $^{13}\text{C}$  NMR spectrum of stachybochartin D (4) in  $\text{CD}_3\text{OD}$ .

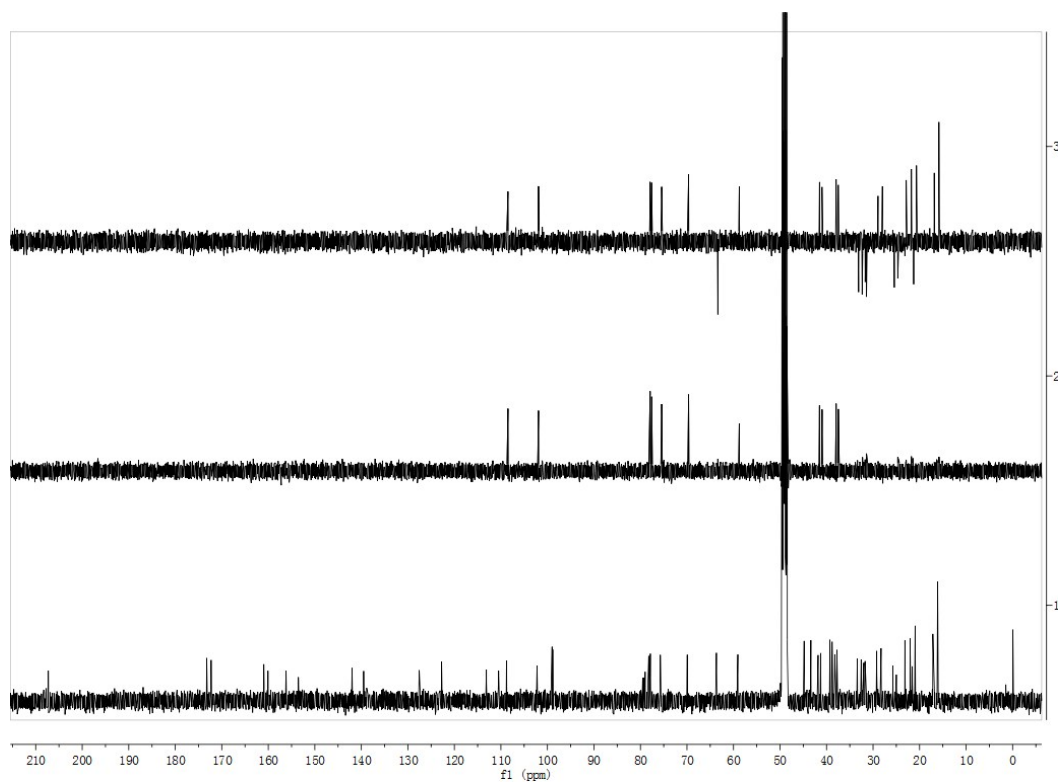

Figure S40. DEPT spectrum of stachybochartin D (4) in  $\text{CD}_3\text{OD}$ .

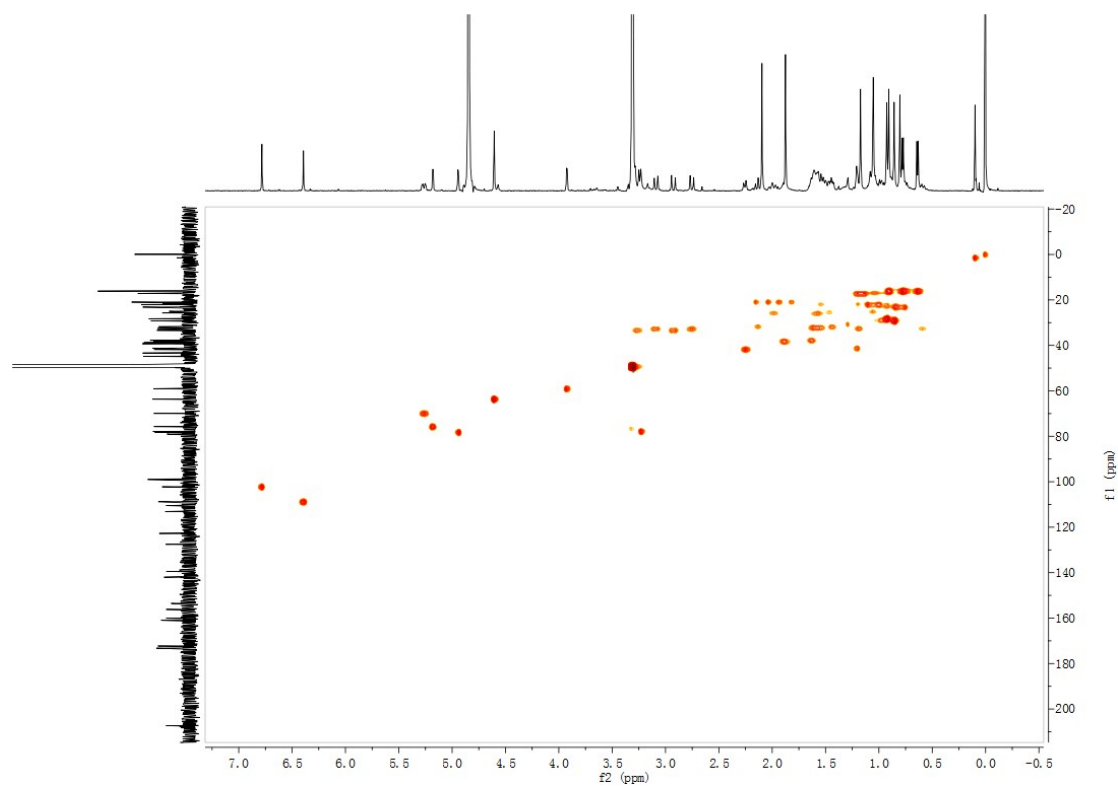

**Figure S41.** HSQC spectrum of stachybochartin D (4) in CD<sub>3</sub>OD.

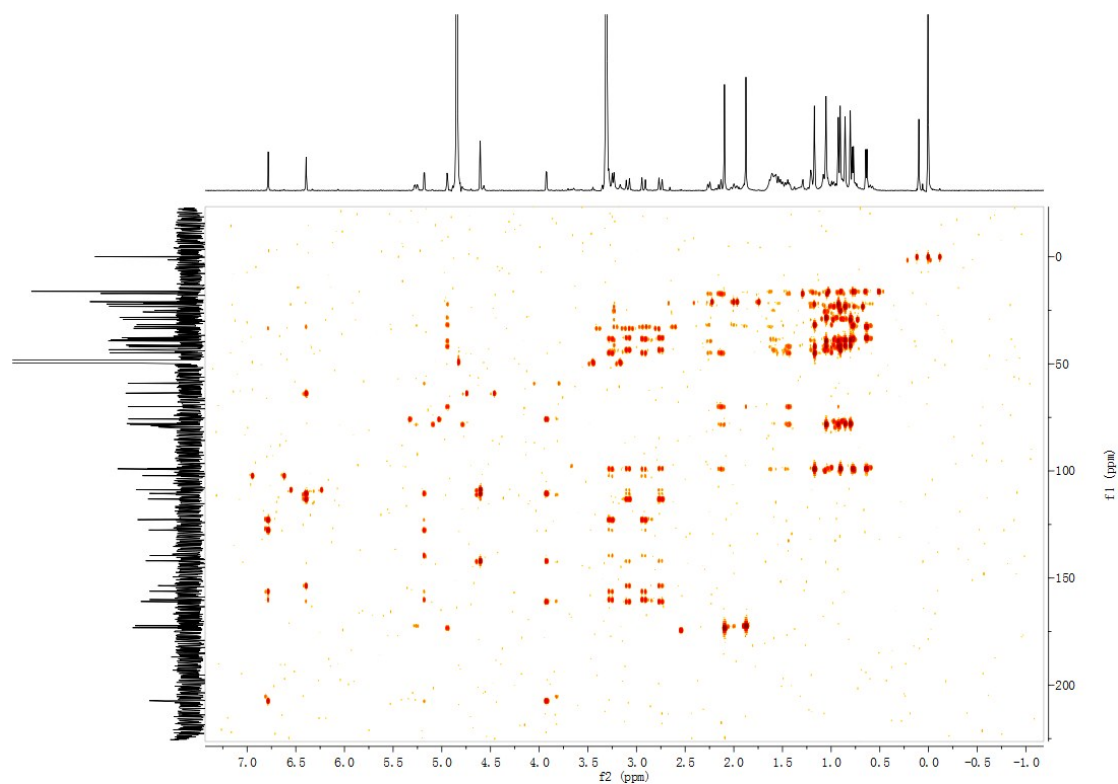

**Figure S42.** HMBC spectrum of stachybochartin D (4) in CD<sub>3</sub>OD.



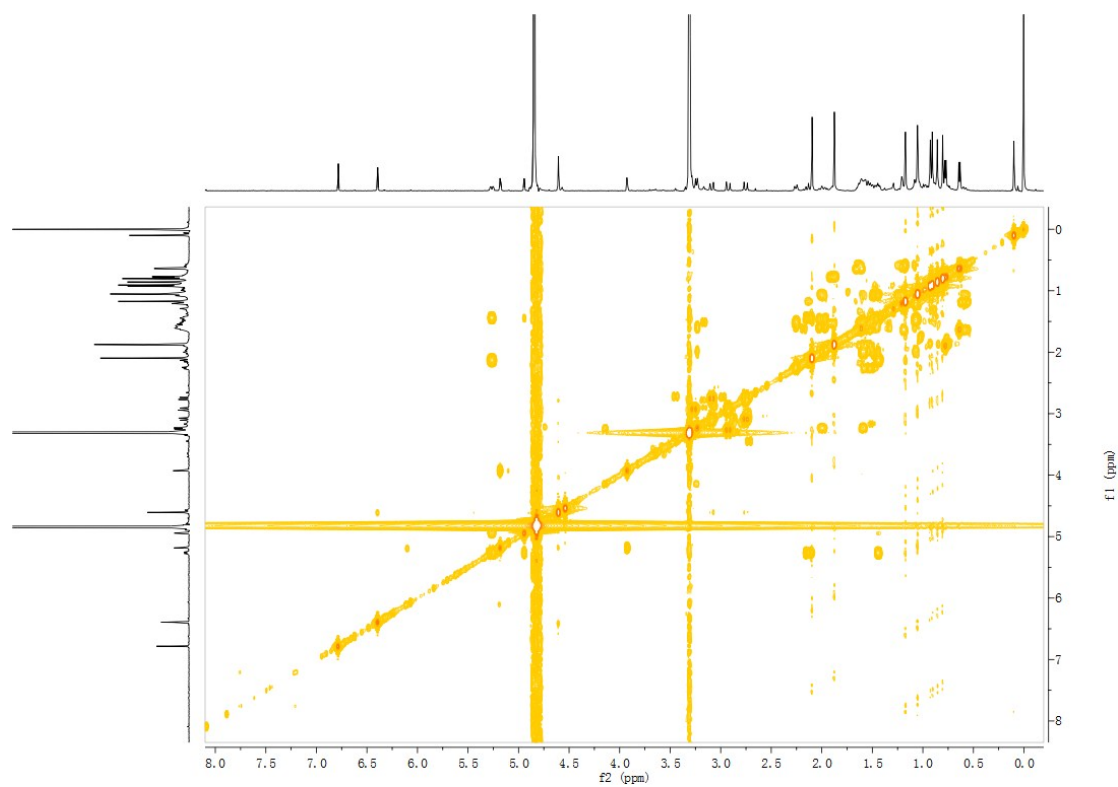

**Figure S43.**  $^1\text{H}$ - $^1\text{H}$  COSY spectrum of stachybochartin D (**4**) in  $\text{CD}_3\text{OD}$ .

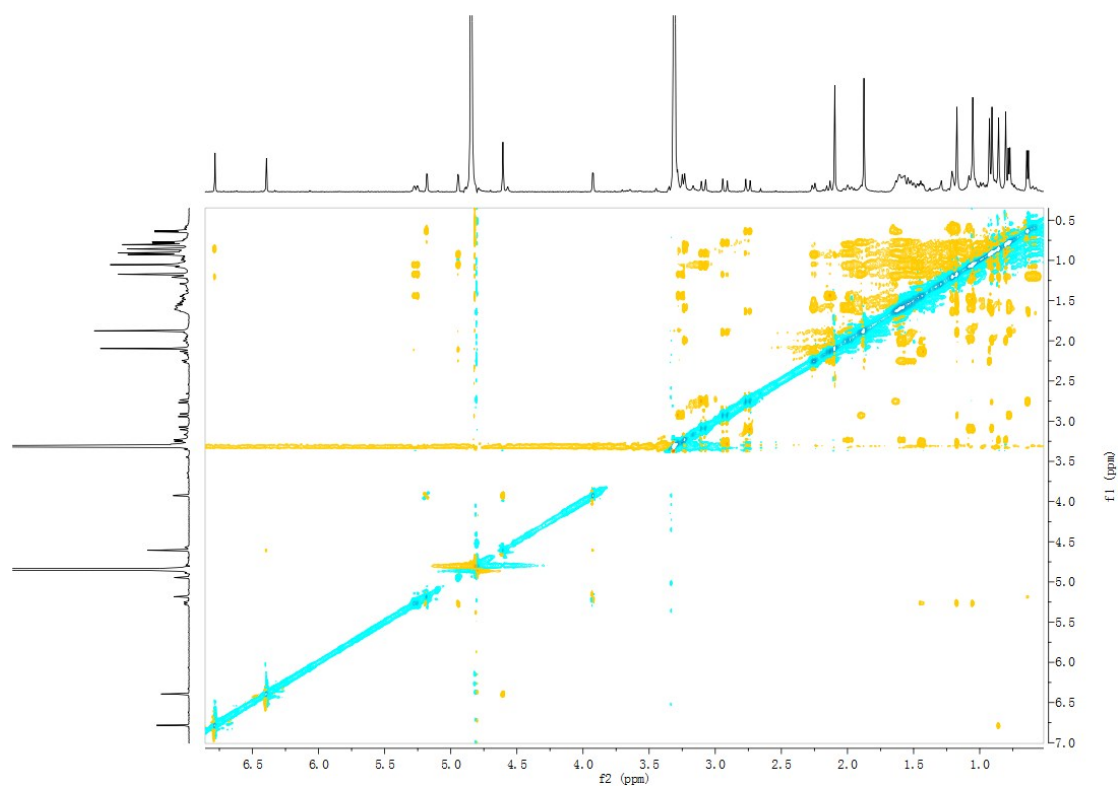

**Figure S44.** ROESY spectrum of stachybochartin D (**4**) in  $\text{CD}_3\text{OD}$ .

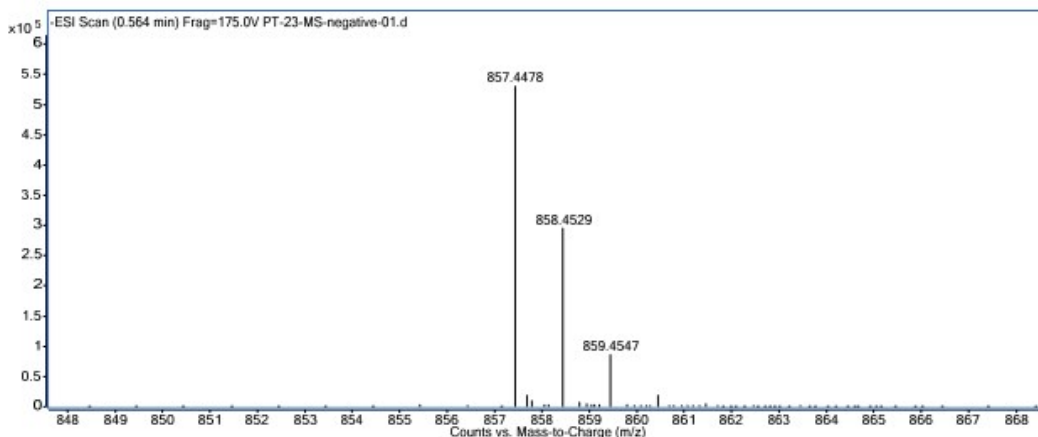

### Elemental Composition Calculator

|                                                 |                                                  |                     |               |                 |                    |
|-------------------------------------------------|--------------------------------------------------|---------------------|---------------|-----------------|--------------------|
| <b>Target m/z:</b>                              | 857.4478                                         | <b>Result type:</b> | Negative ions | <b>Species:</b> | [M-H] <sup>-</sup> |
| <b>Elements:</b>                                | C (0-80); H (0-120); O (0-30); N(0-10); Cl (0-5) |                     |               |                 |                    |
| <b>Ion Formula</b>                              | <b>Calculated m/z</b>                            | <b>PPM Error</b>    |               |                 |                    |
| C <sub>50</sub> H <sub>65</sub> O <sub>12</sub> | 857.4482                                         | 0.38                |               |                 |                    |

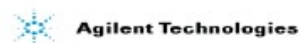

Figure S45. HRESIMS spectrum of stachybochartin D (4).

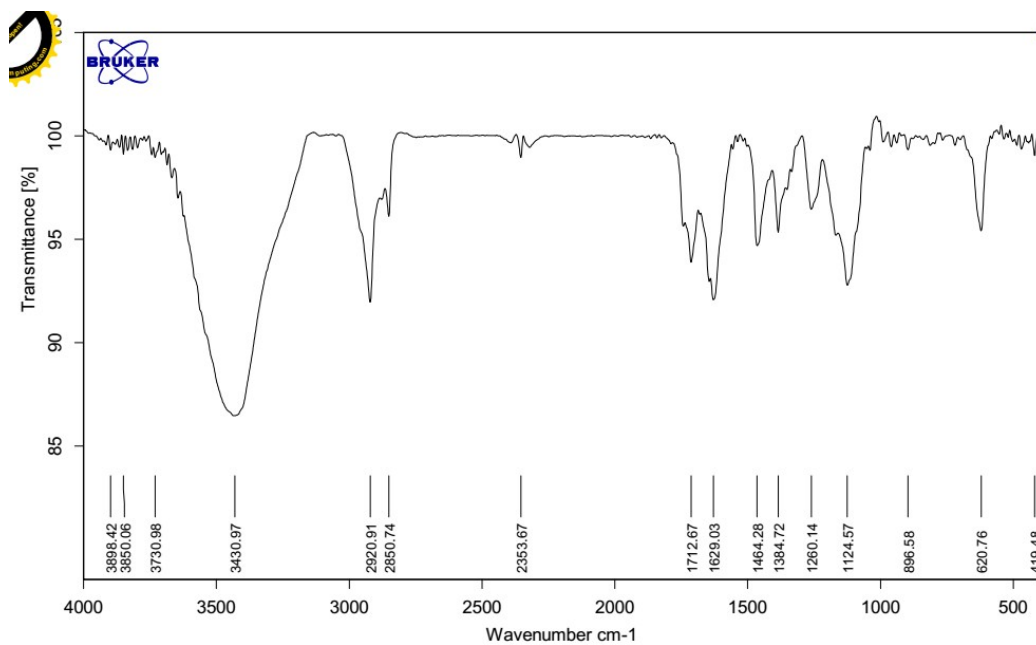

Figure S46. IR (KBr disc) spectrum of stachybochartin D (4).

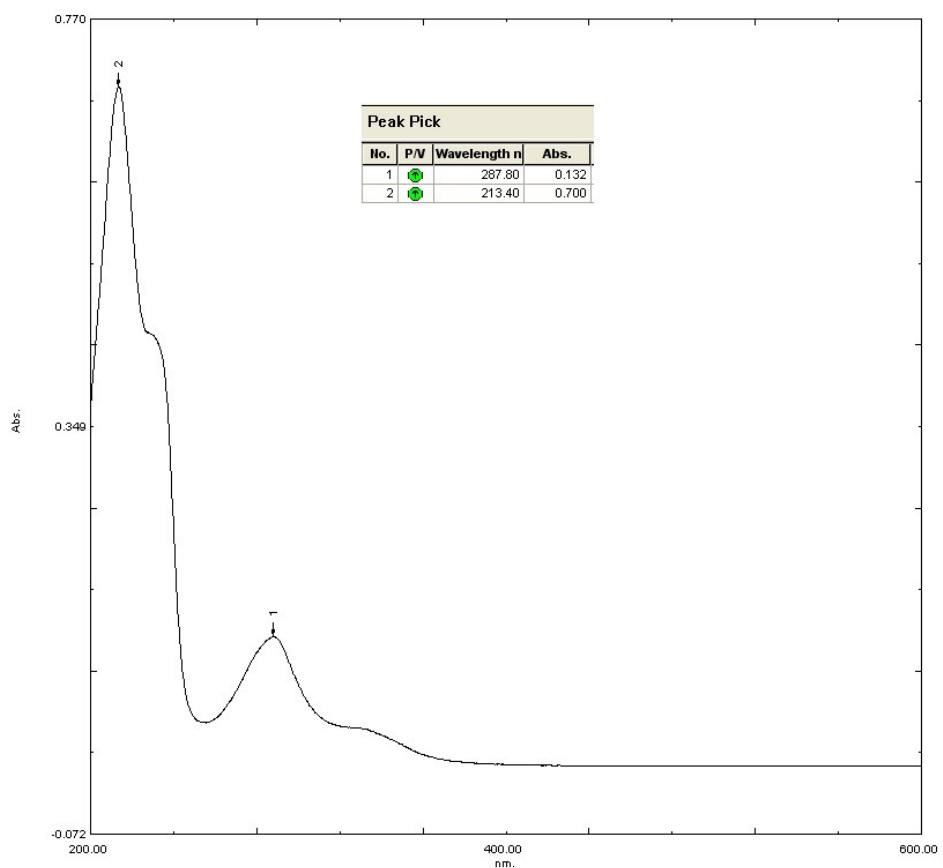

Figure S47. UV spectrum of stachybochartin D (4).

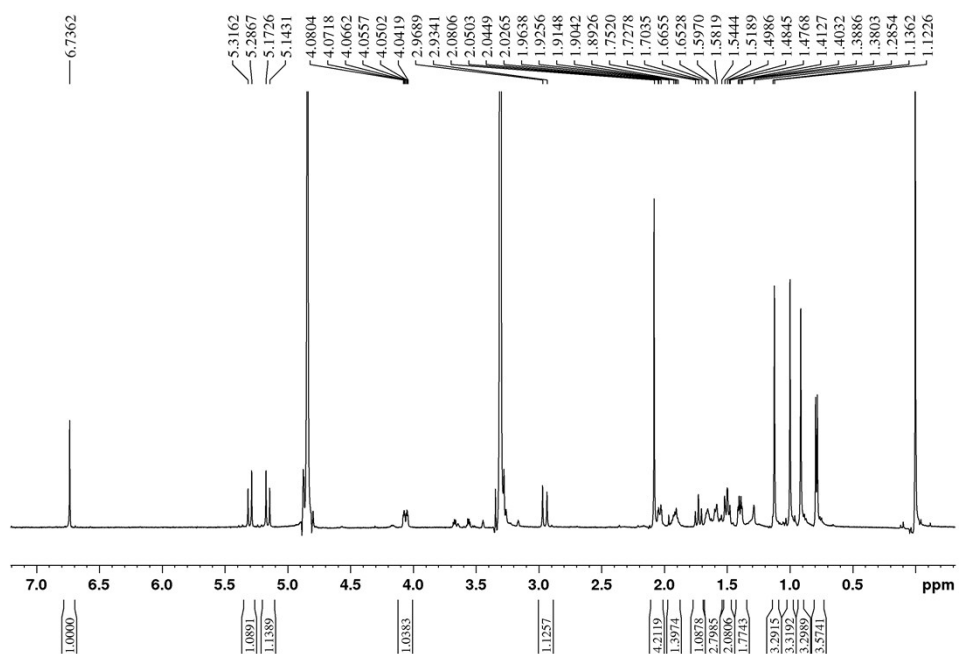

Figure S48. <sup>1</sup>H-NMR spectrum (500 MHz) of stachybochartin E (5) in CD<sub>3</sub>OD.

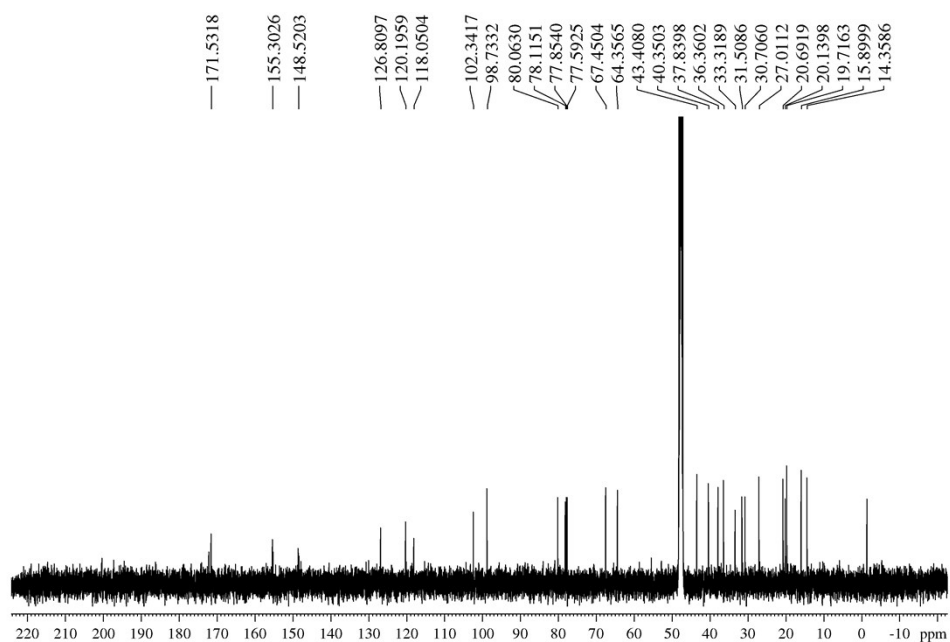

**Figure S49.**  $^{13}\text{C}$ -NMR spectrum (125 MHz) of stachybochartin E (**5**) in  $\text{CD}_3\text{OD}$ .

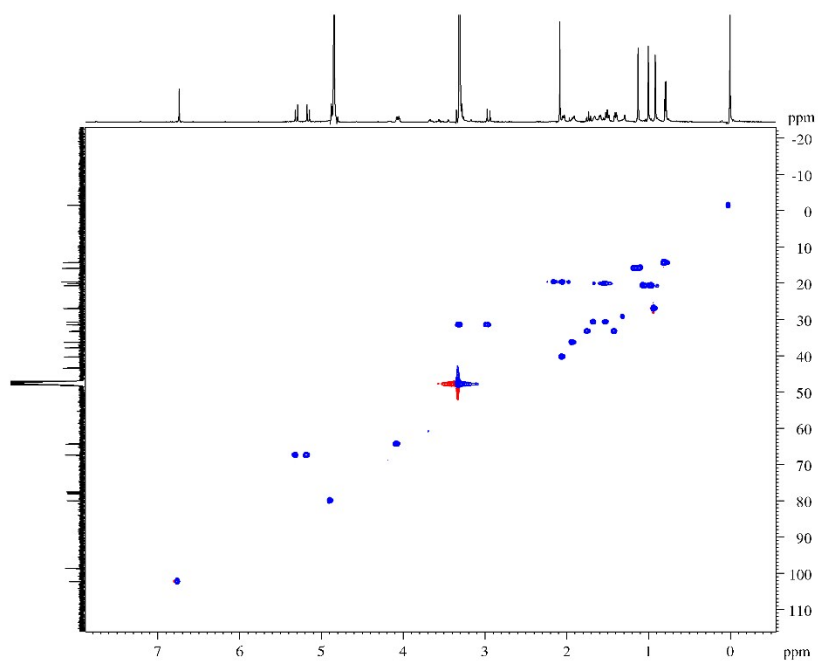

**Figure S50.** HSQC spectrum of stachybochartin E (**5**) in  $\text{CD}_3\text{OD}$

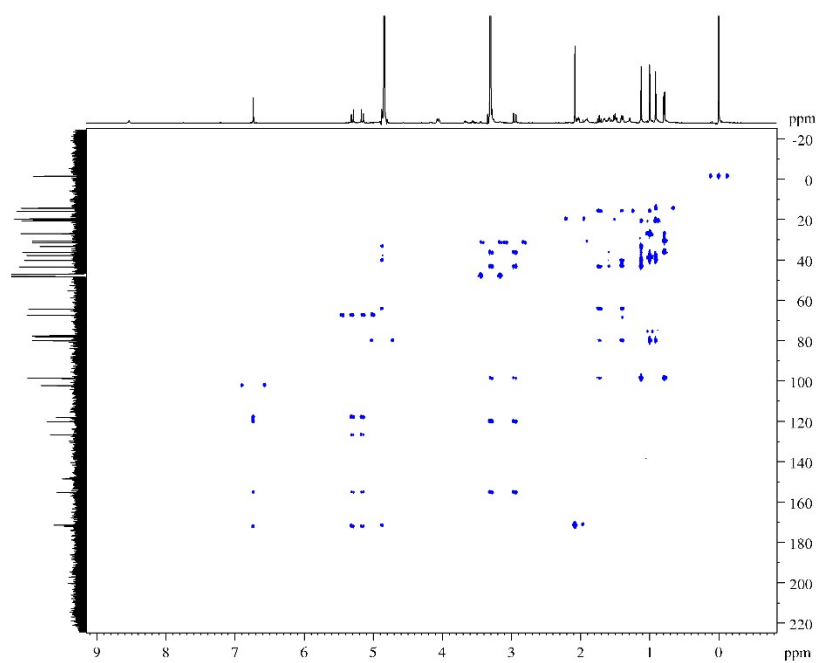

**Figure S51.** HMBC spectrum of stachybochartin E (**5**) in CD<sub>3</sub>OD

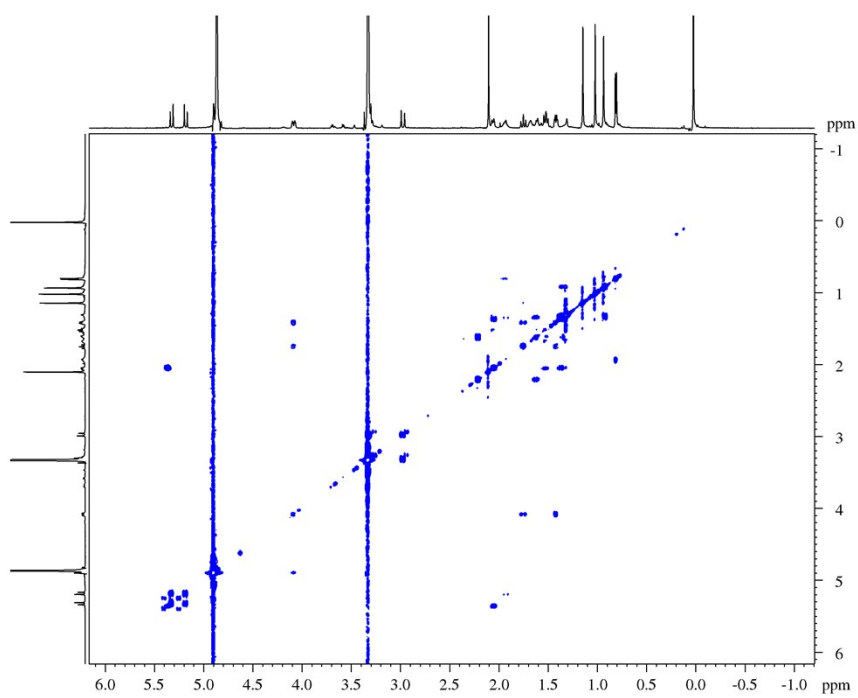

**Figure S52.** <sup>1</sup>H-<sup>1</sup>H COSY spectrum of stachybochartin E (**5**) in CD<sub>3</sub>OD.

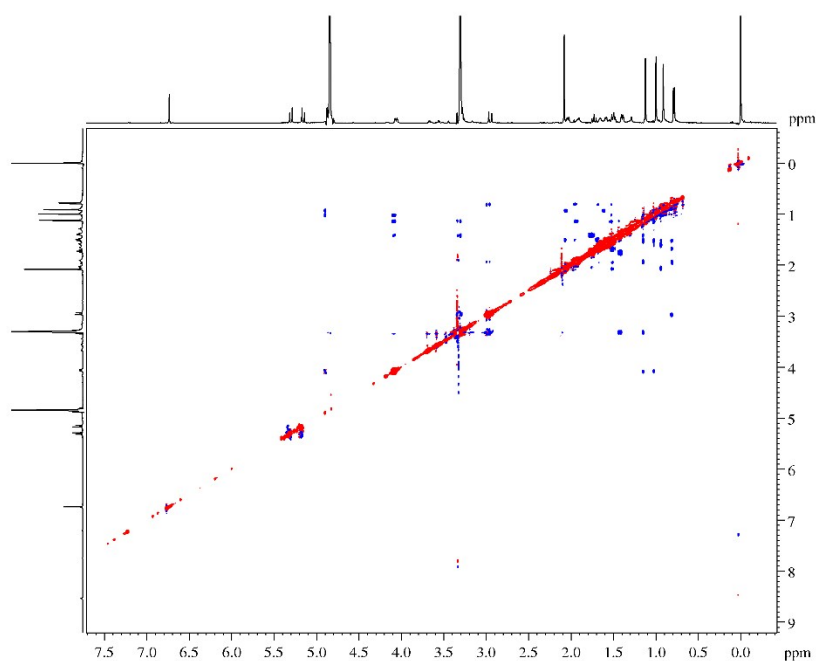

**Figure S53.** ROESY spectrum of stachybochartin E (5) in CD<sub>3</sub>OD

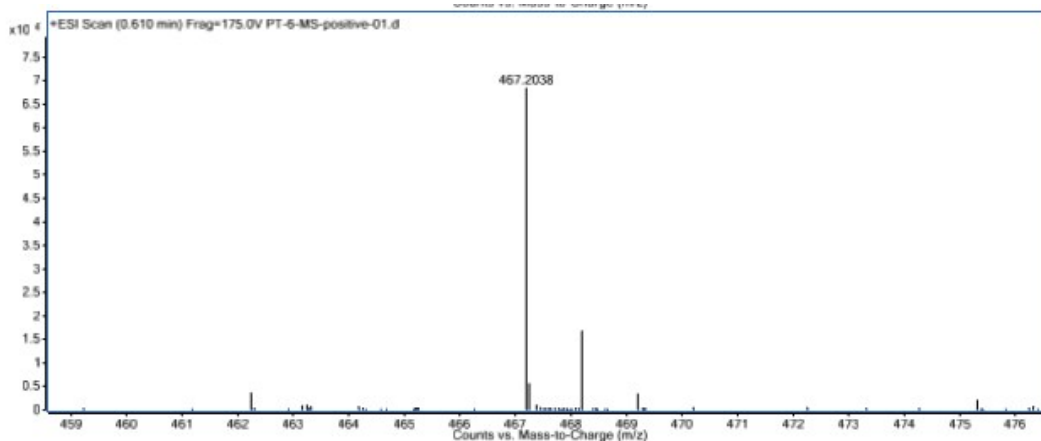

**Elemental Composition Calculator**

|                                                  |                                         |                     |                  |                 |                     |
|--------------------------------------------------|-----------------------------------------|---------------------|------------------|-----------------|---------------------|
| <b>Target m/z:</b>                               | 467.2038                                | <b>Result type:</b> | Positive ions    | <b>Species:</b> | [M+Na] <sup>+</sup> |
| <b>Elements:</b>                                 | C (0-80); H (0-120); O (0-30); Na (0-5) |                     |                  |                 |                     |
| <b>Ion Formula</b>                               | <b>Calculated m/z</b>                   |                     | <b>PPM Error</b> |                 |                     |
| C <sub>25</sub> H <sub>32</sub> NaO <sub>7</sub> | 467.2040                                |                     | 0.55             |                 |                     |

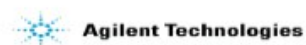

**Figure S54.** HRESIMS spectrum of stachybochartin E (5).

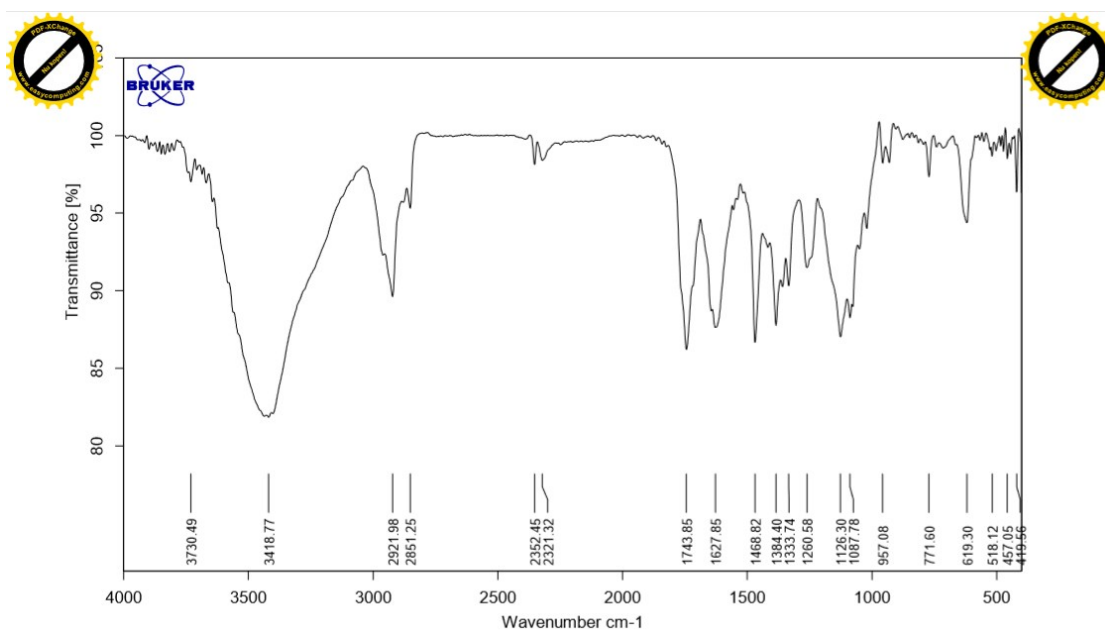

Figure S55. IR (KBr disc) spectrum of stachybochartin E (5).

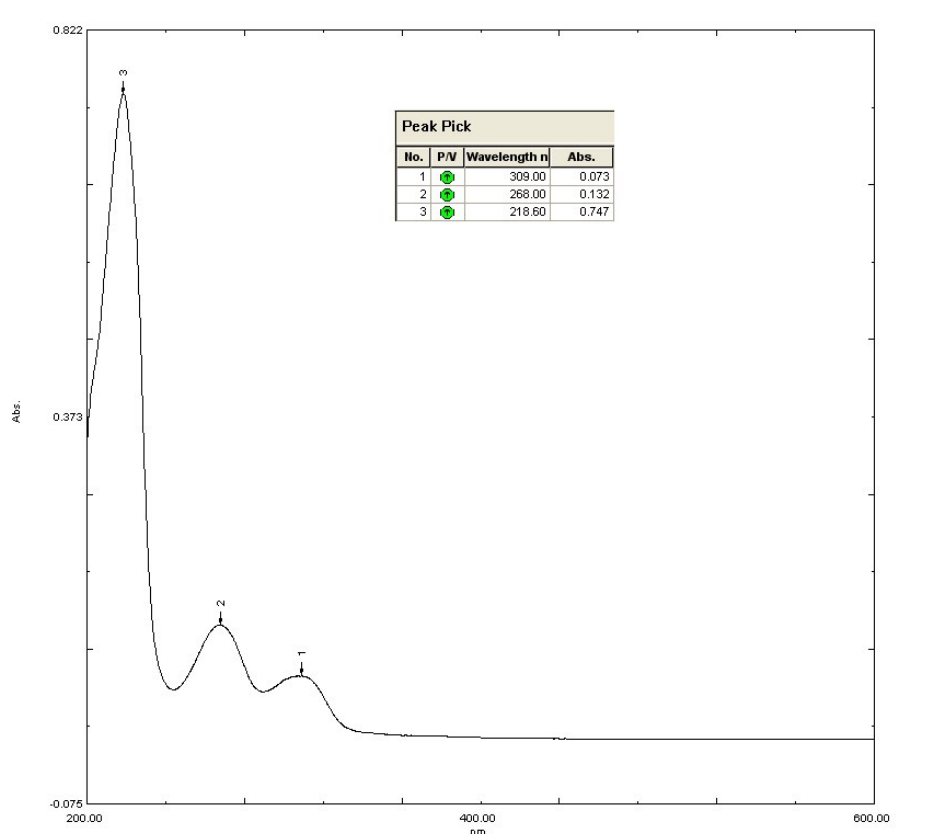

Figure S56. UV spectrum of stachybochartin E (5).

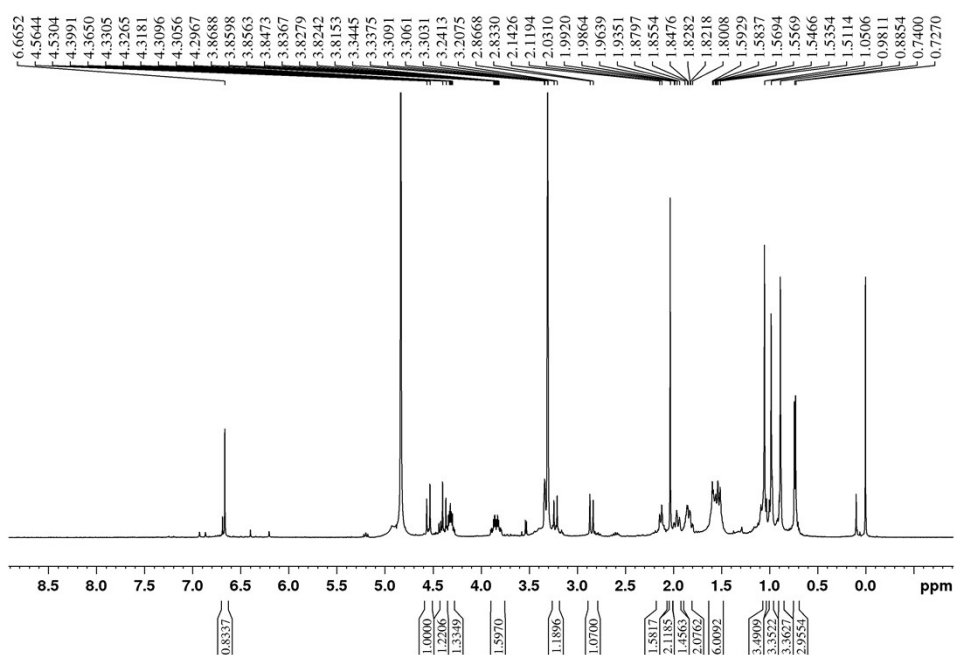

Figure S57.  $^1\text{H}$ -NMR spectrum (500 MHz) of stachybochartin F (**6**) in  $\text{CD}_3\text{OD}$ .

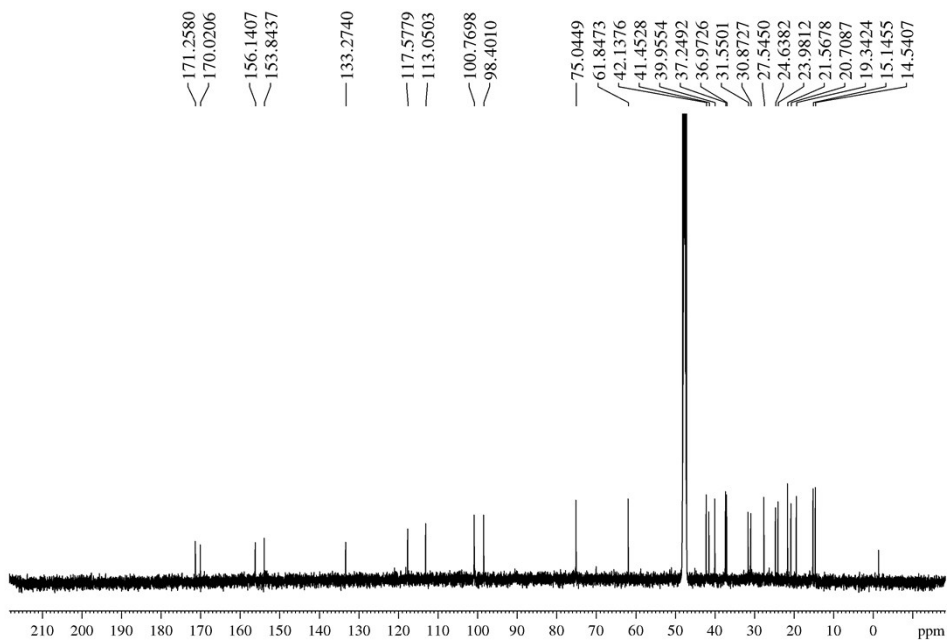

Figure S58.  $^{13}\text{C}$ -NMR spectrum (125 MHz) of stachybochartin F (**6**) in  $\text{CD}_3\text{OD}$ .



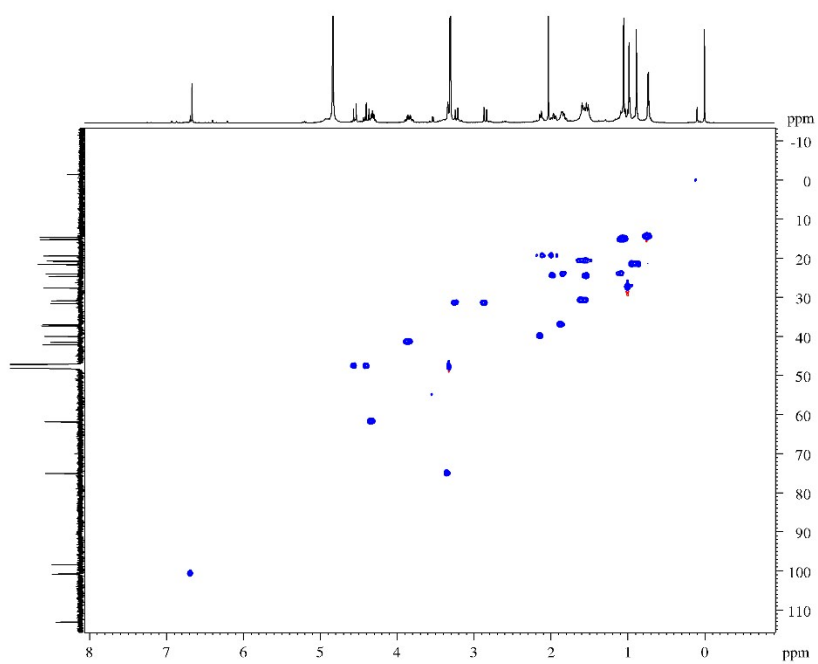

Figure S59. HSQC spectrum of stachybochartin F (6) in CD<sub>3</sub>OD

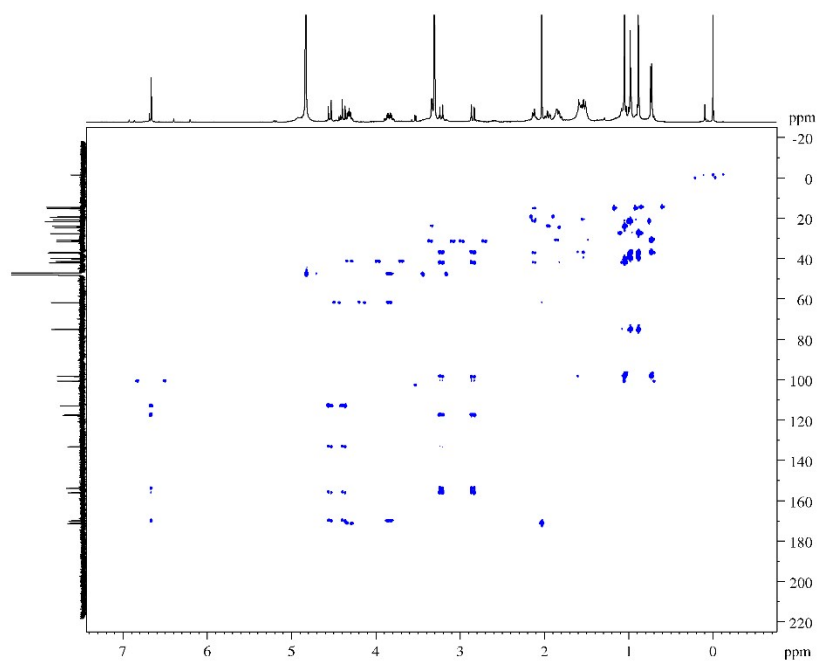

Figure S60. HMBC spectrum of stachybochartin F (6) in CD<sub>3</sub>OD

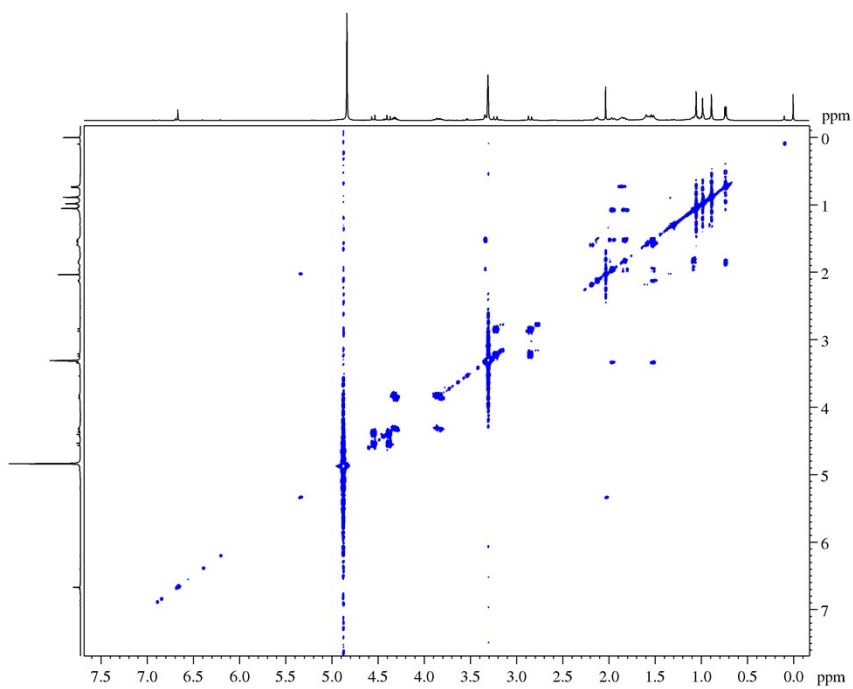

**Figure S61.** <sup>1</sup>H-<sup>1</sup>H COSY spectrum of stachybochartin F (**6**) in CD<sub>3</sub>OD.

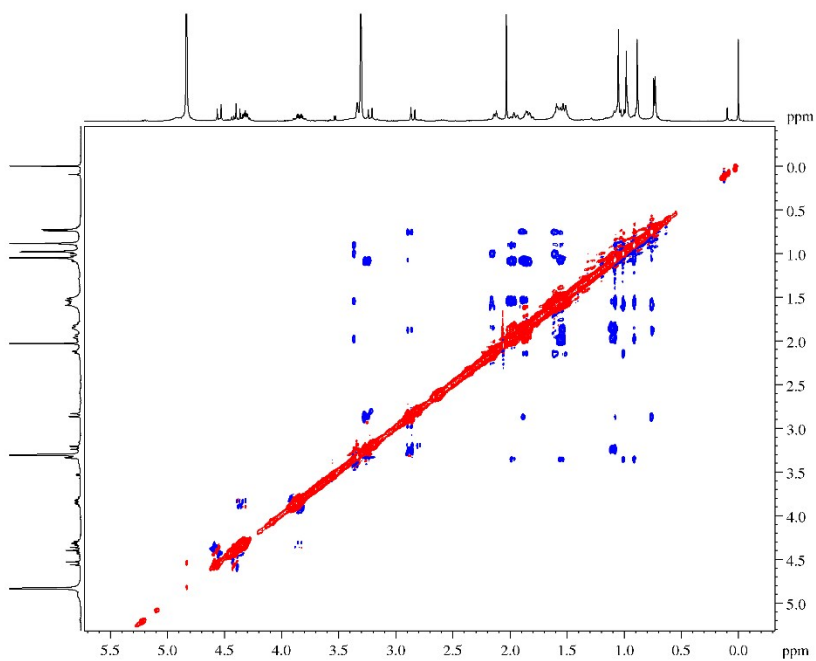

**Figure S62.** ROESY spectrum of stachybochartin F (**6**) in CD<sub>3</sub>OD

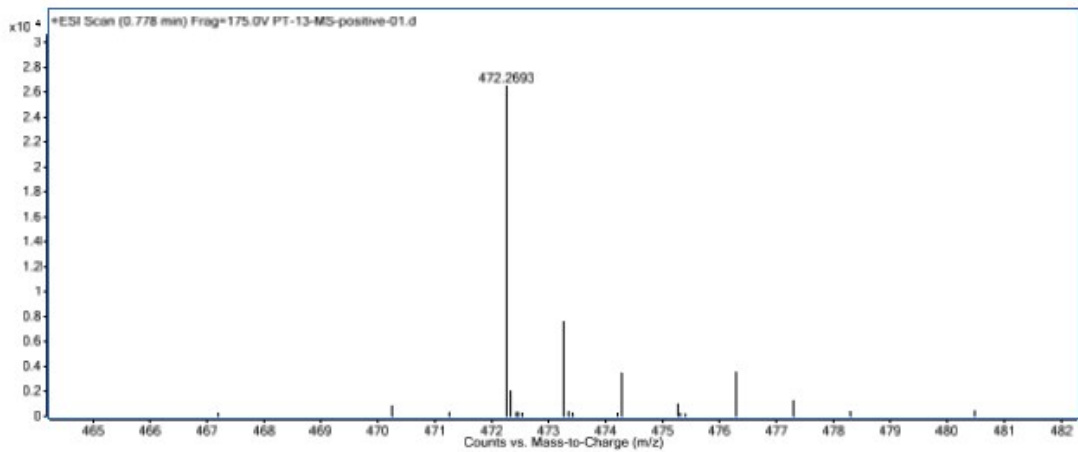

### Elemental Composition Calculator

|                                                               |                                        |                     |                  |                 |                    |
|---------------------------------------------------------------|----------------------------------------|---------------------|------------------|-----------------|--------------------|
| <b>Target m/z:</b>                                            | 472.2693                               | <b>Result type:</b> | Positive ions    | <b>Species:</b> | [M+H] <sup>+</sup> |
| <b>Elements:</b>                                              | C (0-80); H (0-120); O (0-30); N(0-10) |                     |                  |                 |                    |
| <b>Ion Formula</b>                                            | <b>Calculated m/z</b>                  |                     | <b>PPM Error</b> |                 |                    |
| C <sub>27</sub> H <sub>38</sub> N <sub>6</sub> O <sub>6</sub> | 472.2694                               |                     | 0.21             |                 |                    |

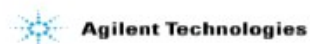

Figure S63. HRESIMS spectrum of stachybochartin F (6).

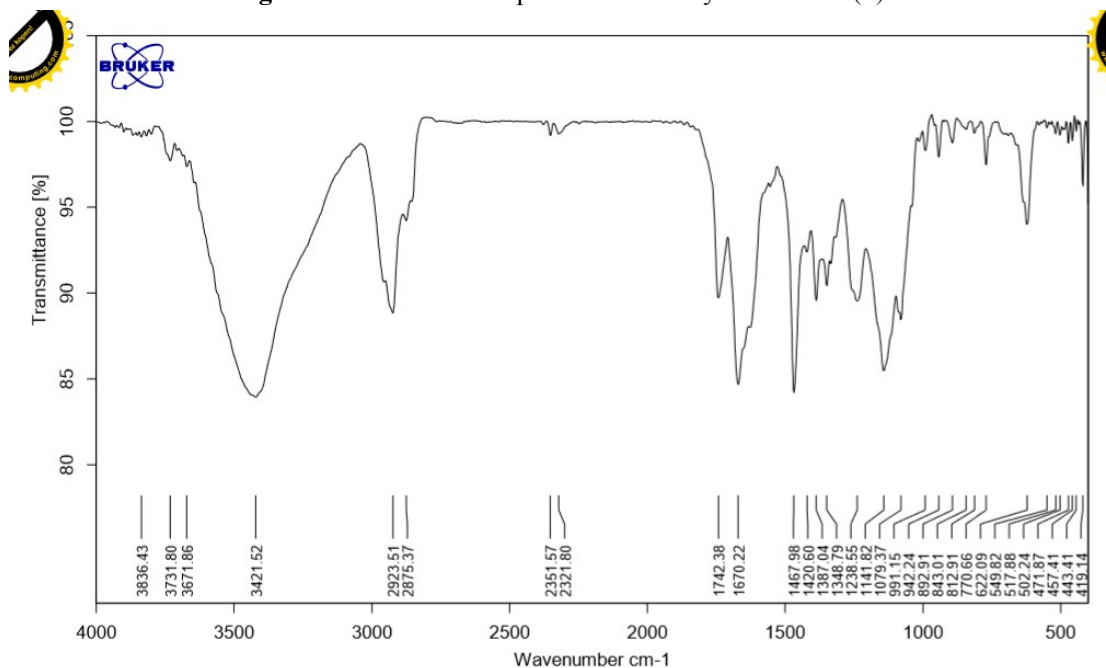

Figure S64. IR (KBr disc) spectrum of stachybochartin F (6).

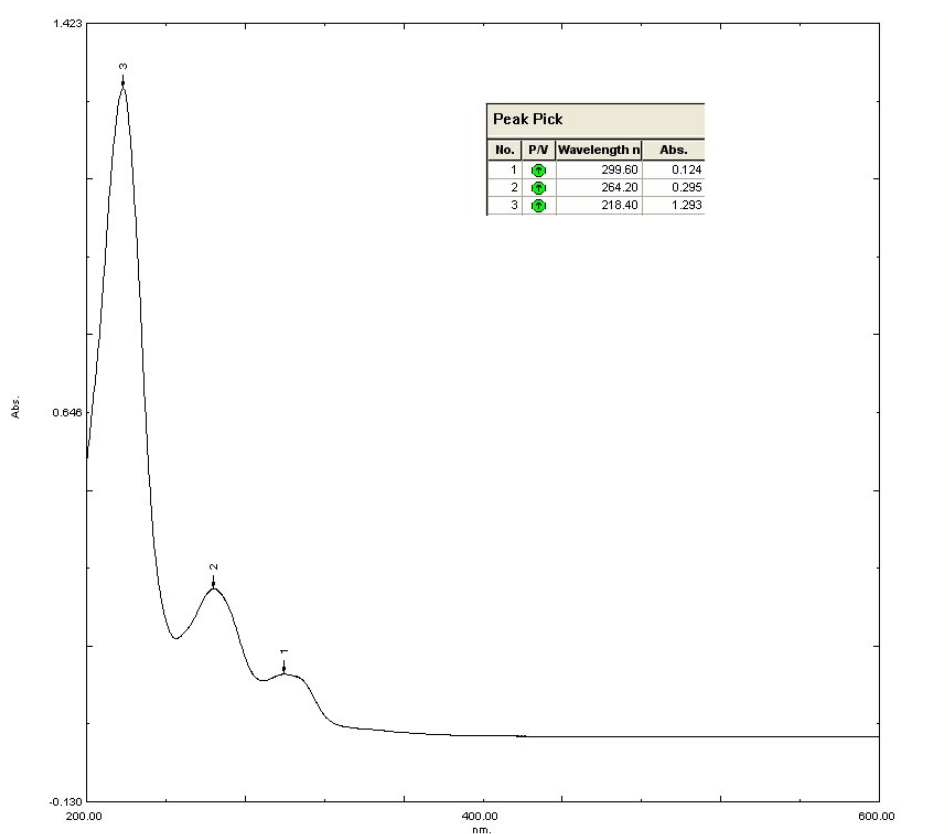

Figure S65. UV spectrum of stachybochartin F (6).

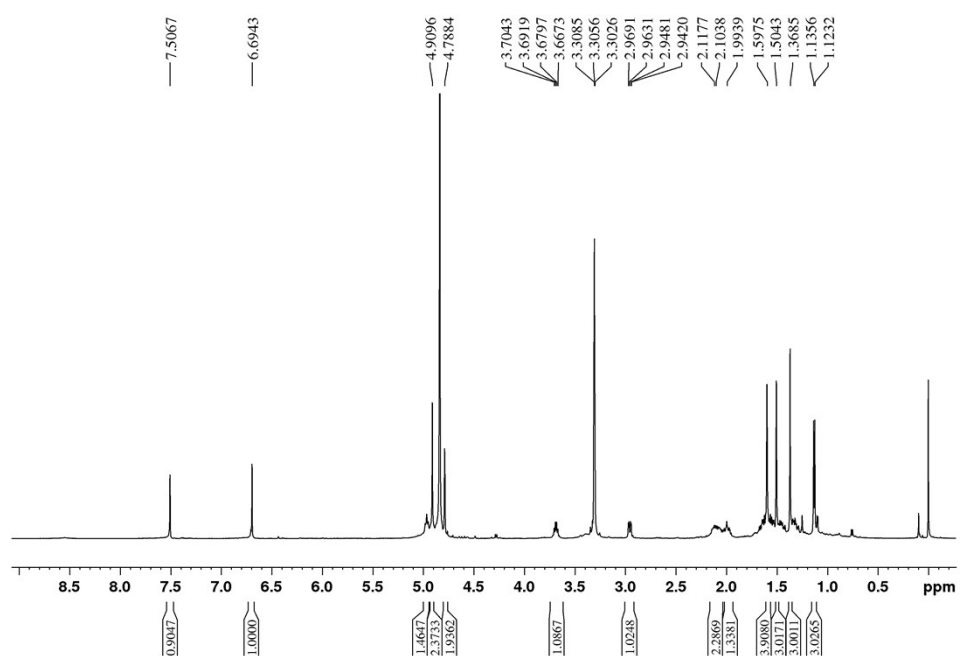

Figure S66. <sup>1</sup>H-NMR spectrum (500 MHz) of stachybochartin G (7) in CD<sub>3</sub>OD.

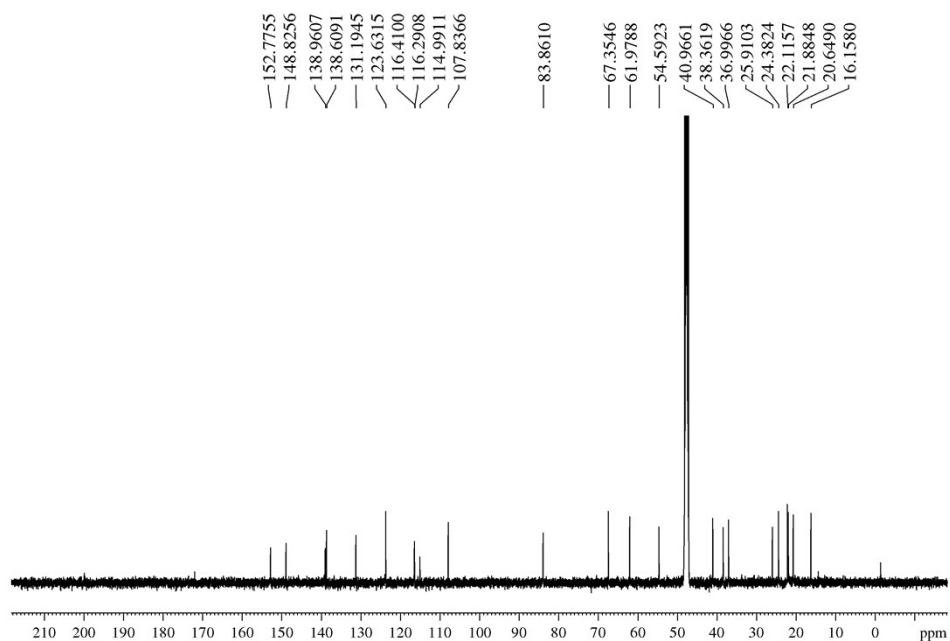

**Figure S67.**  $^{13}\text{C}$ -NMR spectrum (125 MHz) of stachybochartin G (7) in  $\text{CD}_3\text{OD}$ .

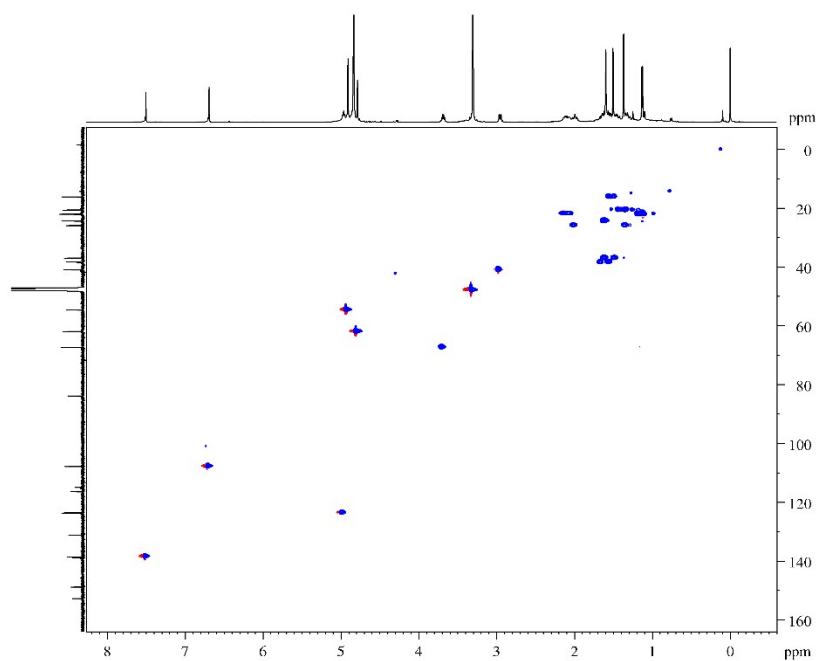

**Figure S68.** HSQC spectrum of stachybochartin G (7) in  $\text{CD}_3\text{OD}$

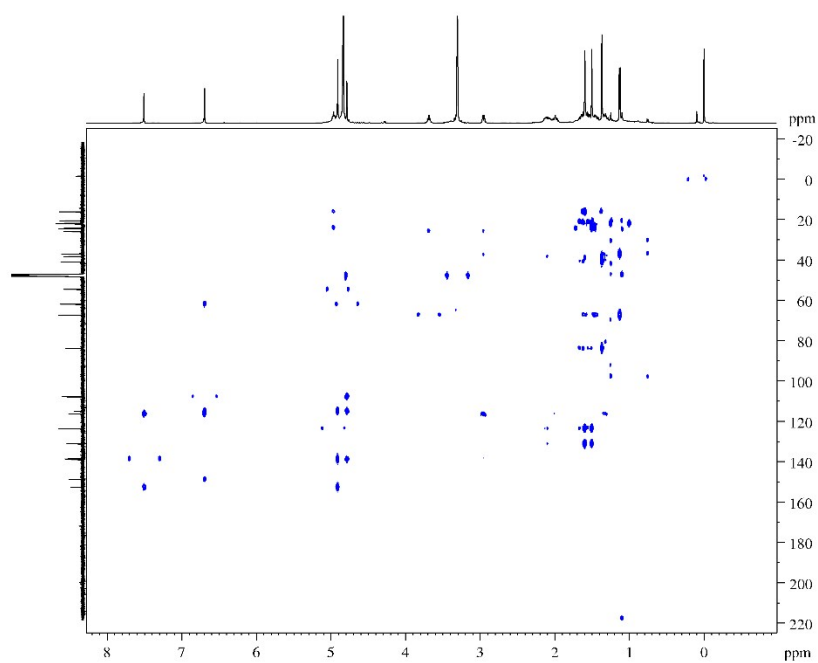

**Figure S69.** HMBC spectrum of stachybochartin G (7) in CD<sub>3</sub>OD

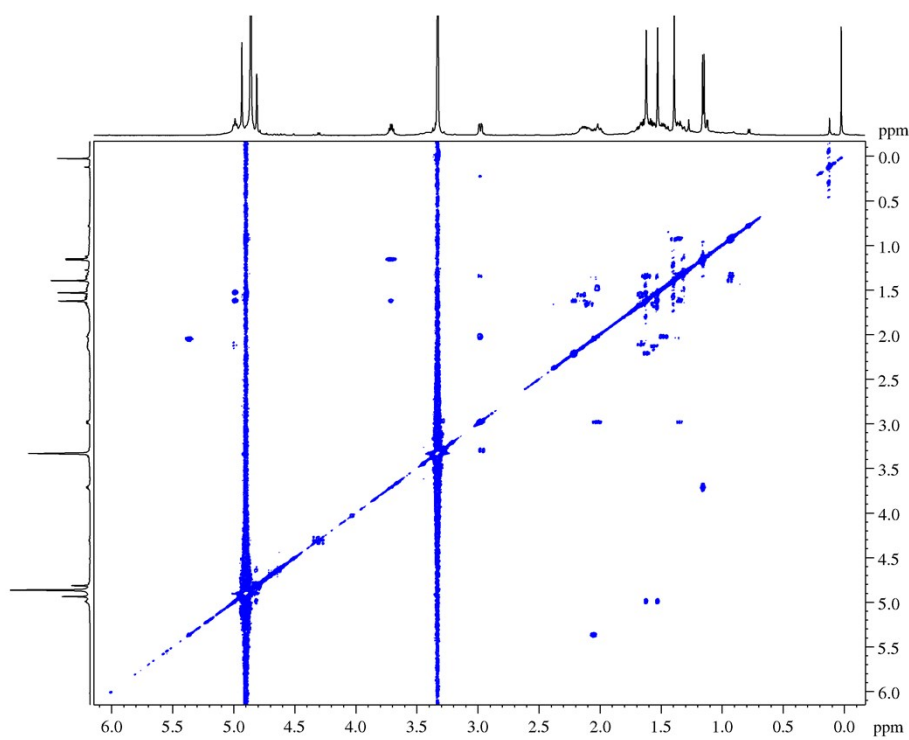

**Figure S70.** <sup>1</sup>H-<sup>1</sup>H COSY spectrum of stachybochartin G (7) in CD<sub>3</sub>OD.

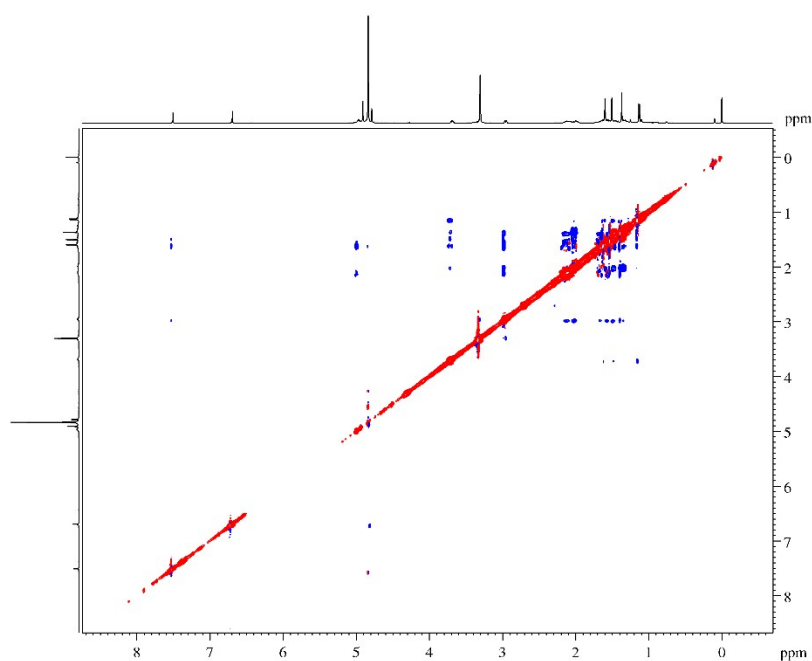

**Figure S71.** ROESY spectrum of stachybochartin G (7) in CD<sub>3</sub>OD

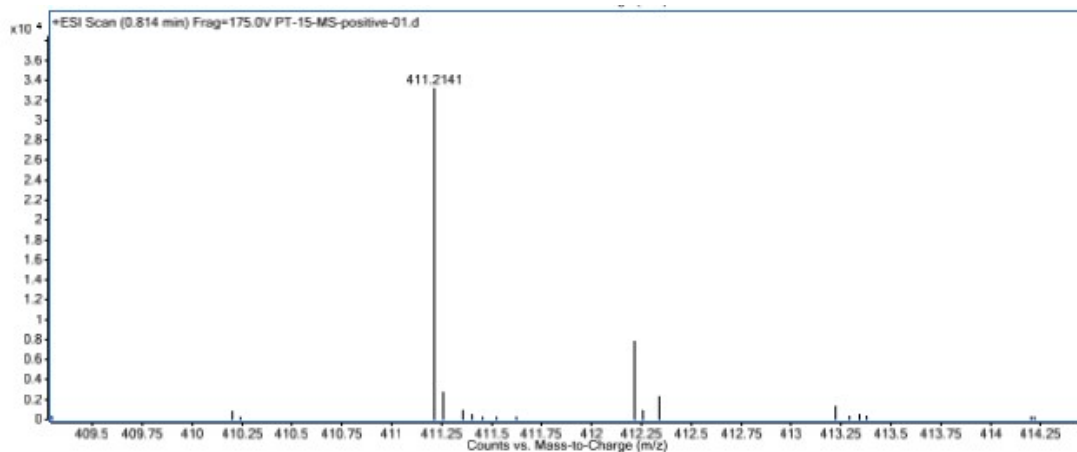

**Elemental Composition Calculator**

|                                                  |                                                  |                     |                  |                 |                     |
|--------------------------------------------------|--------------------------------------------------|---------------------|------------------|-----------------|---------------------|
| <b>Target m/z:</b>                               | 411.2141                                         | <b>Result type:</b> | Positive ions    | <b>Species:</b> | [M+Na] <sup>+</sup> |
| <b>Elements:</b>                                 | C (0-80); H (0-120); O (0-30); N(0-10); Na (0-5) |                     |                  |                 |                     |
| <b>Ion Formula</b>                               | <b>Calculated m/z</b>                            |                     | <b>PPM Error</b> |                 |                     |
| C <sub>23</sub> H <sub>32</sub> NaO <sub>5</sub> | 411.2142                                         |                     | 0.30             |                 |                     |

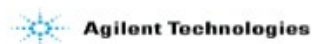

**Figure S72.** HRESIMS spectrum of stachybochartin G (7).

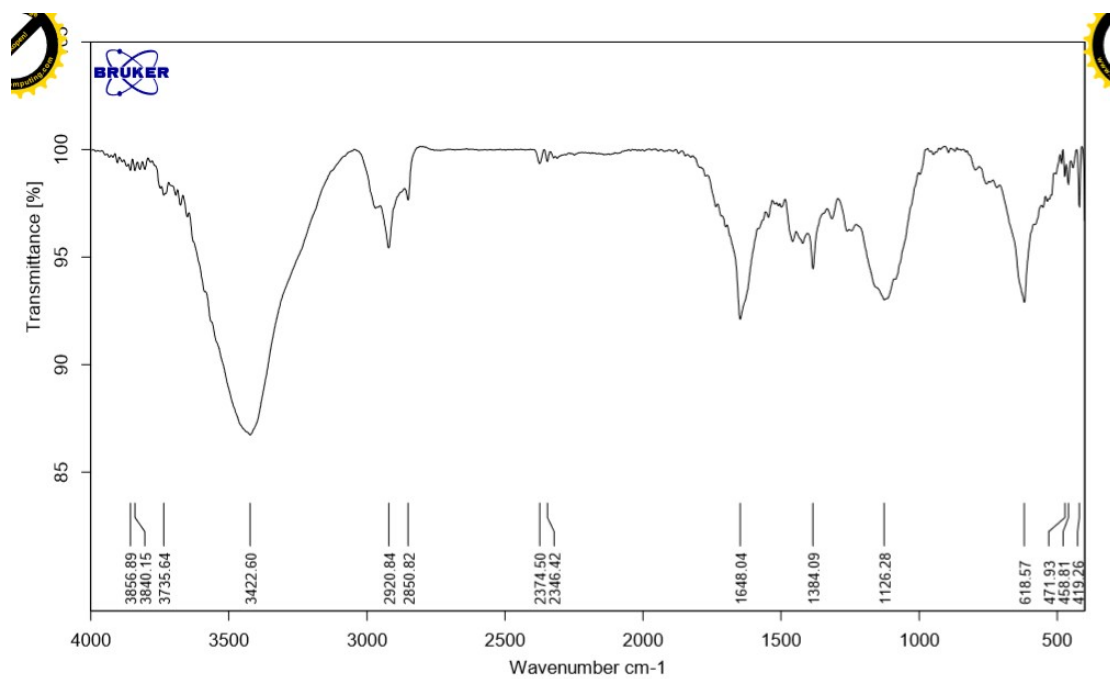

Figure S73. IR (KBr disc) spectrum of stachybochartin G (7).

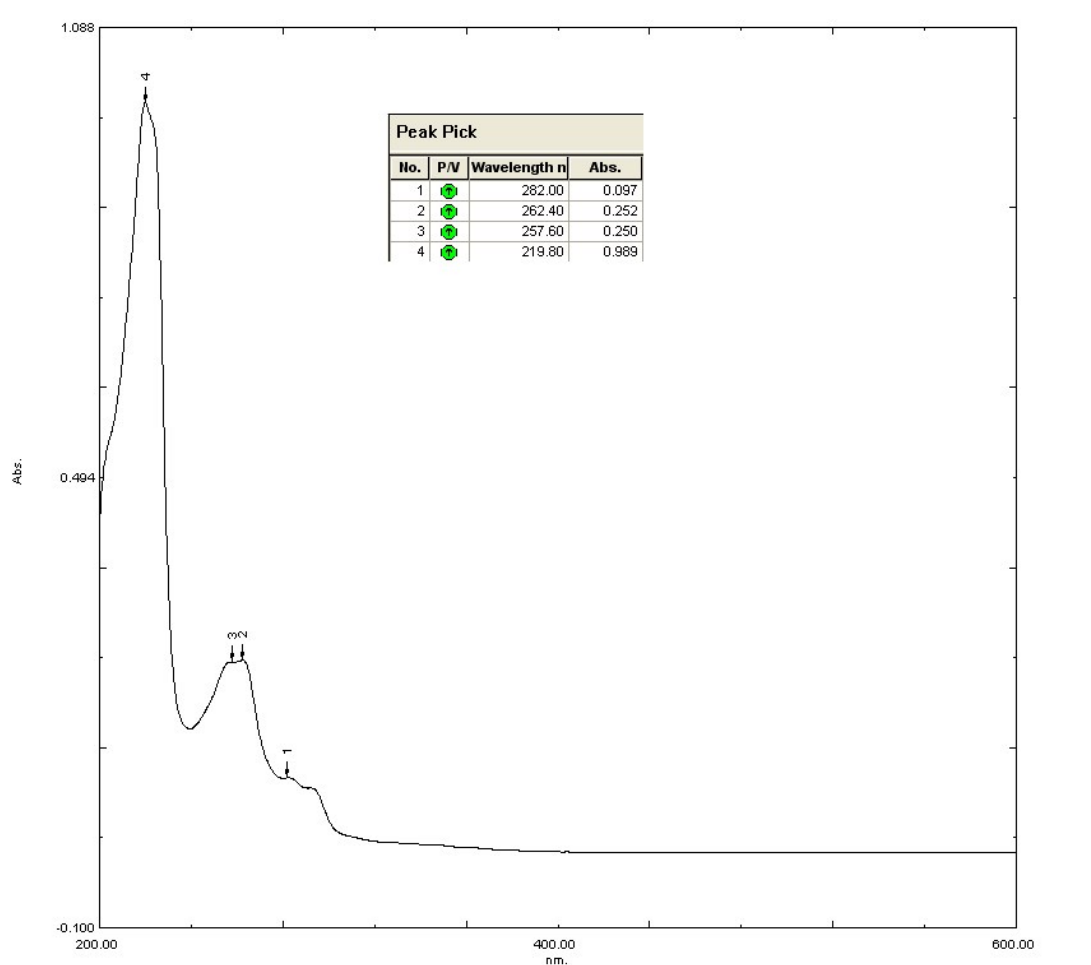

Figure S74. UV spectrum of stachybochartin G (7).
